# Supplementary material
Source: ML conference proceedings conference paper supplement (https://openreview.net/forum?id=pRysdfwXiA)
Supplement: supplementary_material [file supplement.pdf › climate-supp/supplement.pdf]

904 *Supplement to*

905 **“Learning General Causal Structures with Hidden Dynamic**  
906 **Process for Climate Analysis”**  
907

908 Appendix organization:  
909

---

|     |                                                                            |           |
|-----|----------------------------------------------------------------------------|-----------|
| 910 | <b>A Theorem Proofs</b>                                                    | <b>24</b> |
| 911 | A.1 Notation List . . . . .                                                | 24        |
| 912 | A.2 Proof of Theorem 1 . . . . .                                           | 24        |
| 913 | A.3 Component-Wise Identifiability of Latent Variables . . . . .           | 27        |
| 914 | A.4 Proof of Lemma 2 . . . . .                                             | 27        |
| 915 | A.5 Proof of Theorem 2 . . . . .                                           | 28        |
| 916 | A.6 Proof of Corollary 2.1 . . . . .                                       | 29        |
| 917 | A.7 Proof of Theorem 3 . . . . .                                           | 29        |
| 918 | A.8 Proof of Lemma 1 . . . . .                                             | 30        |
| 919 | A.9 Comparison with Existing Methods . . . . .                             | 31        |
| 920 | <b>B Related Work</b>                                                      | <b>31</b> |
| 921 | B.1 Climate Analysis . . . . .                                             | 31        |
| 922 | B.2 Causal Representation Learning . . . . .                               | 32        |
| 923 | B.3 Causal Discovery. . . . .                                              | 32        |
| 924 | B.4 Time-Series Forecasting . . . . .                                      | 32        |
| 925 | <b>C Experiment Details</b>                                                | <b>33</b> |
| 926 | C.1 On Simulation Dataset . . . . .                                        | 33        |
| 927 | C.2 On Real-world Dataset . . . . .                                        | 35        |
| 928 | <b>D More Discussions</b>                                                  | <b>38</b> |
| 929 | D.1 Identifiability of Latent Space in $n$ -order Markov Process . . . . . | 38        |
| 930 | D.2 Allowing Time-Lagged Causal Relationships in Observations . . . . .    | 38        |
| 931 | <b>E Broader Impacts</b>                                                   | <b>41</b> |
| 932 |                                                                            |           |

---

## A Theorem Proofs

### A.1 Notation List

This section collects the notations used in the theorem proofs for clarity and consistency.

Table A5: List of notations, explanations, and corresponding values.

| Index                                      | Explanation                                                                                         | Support                                                                    |
|--------------------------------------------|-----------------------------------------------------------------------------------------------------|----------------------------------------------------------------------------|
| $d_x$                                      | number of observed variables                                                                        | $d_x \in \mathbb{N}^+$                                                     |
| $d_z$                                      | number of latent variables                                                                          | $d_z \in \mathbb{N}^+$ and $d_z \leq d_x$                                  |
| $t$                                        | time index                                                                                          | $t \in \mathbb{N}^+$ and $t \geq 3$                                        |
| $\mathcal{I}$                              | index set of observed variables                                                                     | $\mathcal{I} = \{1, 2, \dots, d_x\}$                                       |
| $\mathcal{J}$                              | index set of latent variables                                                                       | $\mathcal{J} = \{1, 2, \dots, d_z\}$                                       |
| <b>Variable</b>                            |                                                                                                     |                                                                            |
| $\mathcal{X}_t$                            | support of observed variables in time-index $t$                                                     | $\mathcal{X}_t \subseteq \mathbb{R}^{d_x}$                                 |
| $\mathcal{Z}_t$                            | support of latent variables                                                                         | $\mathcal{Z}_t \subseteq \mathbb{R}^{d_z}$                                 |
| $\mathbf{x}_t$                             | observed variables in time-index $t$                                                                | $\mathbf{x}_t \in \mathcal{X}_t$                                           |
| $\mathbf{z}_t$                             | latent variables in time-index $t$                                                                  | $\mathbf{z}_t \in \mathcal{Z}_t$                                           |
| $\mathbf{s}_t$                             | dependent noise of observations in time-index $t$                                                   | $\mathbf{s}_t \in \mathbb{R}^{d_x}$                                        |
| $\epsilon_{\mathbf{x}_t}$                  | independent noise for generating $\mathbf{s}_t$ in time-index $t$                                   | $\epsilon_{\mathbf{x}_t} \sim p_{\epsilon_x}$                              |
| $\epsilon_{\mathbf{z}_t}$                  | independent noise of latent variables in time-index $t$                                             | $\epsilon_{\mathbf{z}_t} \sim p_{\epsilon_z}$                              |
| $\mathbf{z}_t \setminus [i, j]$            | latent variables except for $z_{t,i}$ and $z_{t,j}$ in time-index $t$                               | /                                                                          |
| <b>Function</b>                            |                                                                                                     |                                                                            |
| $p_{a b}(\cdot   b)$                       | density function of $a$ given $b$                                                                   | /                                                                          |
| $p_{a,b c}(a, \cdot   c)$                  | joint density function of $(a, b)$ given $a$ and $c$                                                | /                                                                          |
| $\text{pa}(\cdot)$                         | variable's parents                                                                                  | /                                                                          |
| $\text{pa}_O(\cdot)$                       | variable's parents in observed space                                                                | /                                                                          |
| $\text{pa}_L(\cdot)$                       | variable's parents in latent space                                                                  | /                                                                          |
| $g(\cdot)$                                 | generating function of SEM from $(\mathbf{z}_t, \mathbf{s}_t, \mathbf{x}_t)$ to $\mathbf{x}_t$      | $\mathbb{R}^{d_z+2d_x} \rightarrow \mathbb{R}^{d_x}$                       |
| $m(\cdot)$                                 | mixing function of ICA from $(\mathbf{z}_t, \mathbf{s}_t)$ to $\mathbf{x}_t$                        | $\mathbb{R}^{d_z+d_x} \rightarrow \mathbb{R}^{d_x}$                        |
| $h_z(\cdot)$                               | invertible transformation from $\mathbf{z}_t$ to $\hat{\mathbf{z}}_t$                               | $\mathbb{R}^{d_z} \rightarrow \mathbb{R}^{d_z}$                            |
| $\pi(\cdot)$                               | permutation function                                                                                | $\mathbb{R}^{d_x} \rightarrow \mathbb{R}^{d_x}$                            |
| $\text{supp}(\cdot)$                       | support matrix of Jacobian matrix                                                                   | $\mathbb{R}^{d_x \times d_x} \rightarrow \{0, 1\}^{d_x \times d_x}$        |
| <b>Symbol</b>                              |                                                                                                     |                                                                            |
| $A \rightarrow B$                          | $A$ causes $B$ directly                                                                             | /                                                                          |
| $A \dashrightarrow B$                      | $A$ causes $B$ indirectly                                                                           | /                                                                          |
| $\mathbf{J}_g(\mathbf{x}_t)$               | Jacobian matrix representing observed causal DAG                                                    | $\mathbf{J}_g(\mathbf{x}_t) \in \mathbb{R}^{d_x \times d_x}$               |
| $\mathbf{J}_g(\mathbf{x}_t, \mathbf{s}_t)$ | Jacobian matrix representing mixing structure from $(\mathbf{x}_t, \mathbf{s}_t)$ to $\mathbf{x}_t$ | $\mathbf{J}_g(\mathbf{x}_t, \mathbf{s}_t) \in \mathbb{R}^{d_x \times d_x}$ |
| $\mathbf{J}_m(\mathbf{s}_t)$               | Jacobian matrix representing mixing structure from $\mathbf{s}_t$ to $\mathbf{x}_t$                 | $\mathbf{J}_m(\mathbf{s}_t) \in \mathbb{R}^{d_x \times d_x}$               |
| $\mathbf{J}_r(\mathbf{z}_{t-1})$           | Jacobian matrix representing latent time-lagged structure                                           | $\mathbf{J}_r(\mathbf{z}_{t-1}) \in \mathbb{R}^{d_z \times d_z}$           |
| $\mathbf{J}_r(\mathbf{z}_t)$               | Jacobian matrix representing instantaneous latent causal graph                                      | $\mathbf{J}_r(\mathbf{z}_t) \in \mathbb{R}^{d_z \times d_z}$               |

### A.2 Proof of Theorem 1

We first introduce another operator to represent the point-wise distributional multiplication. To maintain generality, we denote two variables as  $a$  and  $b$ , with respective support sets  $\mathcal{A}$  and  $\mathcal{B}$ .

**Definition 2. (Diagonal Operator)** Consider two random variable  $a$  and  $b$ , density functions  $p_a$  and  $p_b$  are defined on some support  $\mathcal{A}$  and  $\mathcal{B}$ , respectively. The diagonal operator  $D_{b|a}$  maps the density function  $p_a$  to another density function  $D_{b|a} \circ p_a$  defined by the pointwise multiplication of the function  $p_{b|a}$  at a fixed point  $b$ :

$$p_{b|a}(b | \cdot) p_a = D_{b|a} \circ p_a, \text{ where } D_{b|a} = p_{b|a}(b | \cdot). \quad (\text{A1})$$

*Proof.*  $\mathbf{x}_{t-1}, \mathbf{x}_t, \mathbf{x}_{t+1}$  are conditional independent given  $\mathbf{z}_t$ , which implies two equations:

$$p(\mathbf{x}_{t-1} | \mathbf{x}_t, \mathbf{z}_t) = p(\mathbf{x}_{t-1} | \mathbf{z}_t), \quad p(\mathbf{x}_{t+1} | \mathbf{x}_t, \mathbf{x}_{t-1}, \mathbf{z}_t) = p(\mathbf{x}_{t+1} | \mathbf{z}_t). \quad (\text{A2})$$

944 We can obtain  $p(\mathbf{x}_{t+1}, \mathbf{x}_t \mid \mathbf{x}_{t-1})$  directly from the observations,  $p(\mathbf{x}_{t-1})$  and  $p(\mathbf{x}_{t+1}, \mathbf{x}_t, \mathbf{x}_{t-1})$ , and  
 945 then the transformation in density function are established by

$$\begin{aligned}
 p(\mathbf{x}_{t+1}, \mathbf{x}_t \mid \mathbf{x}_{t-1}) &= \underbrace{\int_{\mathcal{Z}_t} p(\mathbf{x}_{t+1}, \mathbf{x}_t, \mathbf{z}_t \mid \mathbf{x}_{t-1}) d\mathbf{z}_t}_{\text{integration over } \mathcal{Z}_t} = \underbrace{\int_{\mathcal{Z}_t} p(\mathbf{x}_{t+1} \mid \mathbf{x}_t, \mathbf{z}_t, \mathbf{x}_{t-1}) p(\mathbf{x}_t, \mathbf{z}_t \mid \mathbf{x}_{t-1}) d\mathbf{z}_t}_{\text{factorization of joint conditional probability}} \\
 &= \underbrace{\int_{\mathcal{Z}_t} p(\mathbf{x}_{t+1} \mid \mathbf{z}_t) p(\mathbf{x}_t, \mathbf{z}_t \mid \mathbf{x}_{t-1}) d\mathbf{z}_t}_{\text{by } p(\mathbf{x}_{t+1} \mid \mathbf{x}_t, \mathbf{x}_{t-1}, \mathbf{z}_t) = p(\mathbf{x}_{t+1} \mid \mathbf{z}_t)} = \underbrace{\int_{\mathcal{Z}_t} p(\mathbf{x}_{t+1} \mid \mathbf{z}_t) p(\mathbf{x}_t \mid \mathbf{z}_t) p(\mathbf{z}_t \mid \mathbf{x}_{t-1}) d\mathbf{z}_t}_{\text{by } p(\mathbf{x}_{t-1} \mid \mathbf{x}_t, \mathbf{z}_t) = p(\mathbf{x}_{t-1} \mid \mathbf{z}_t)}.
 \end{aligned} \tag{A3}$$

946 Then we show how to transform the Eq. (A3) to the form of spectral decomposition:

$$\begin{aligned}
 \Rightarrow \int_{\mathcal{X}_{t-1}} p(\mathbf{x}_{t+1}, \mathbf{x}_t \mid \mathbf{x}_{t-1}) p(\mathbf{x}_{t-1}) d\mathbf{x}_{t-1} &= \\
 \int_{\mathcal{X}_{t-1}} \int_{\mathcal{Z}_t} p(\mathbf{x}_{t+1} \mid \mathbf{z}_t) p(\mathbf{x}_t \mid \mathbf{z}_t) p(\mathbf{z}_t \mid \mathbf{x}_{t-1}) p(\mathbf{x}_{t-1}) d\mathbf{z}_t d\mathbf{x}_{t-1} &\tag{A4}
 \end{aligned}$$

$$\Rightarrow [L_{\mathbf{x}_t; \mathbf{x}_{t+1} \mid \mathbf{x}_{t-1}} p](\mathbf{x}_{t+1}) = [L_{\mathbf{x}_{t+1} \mid \mathbf{z}_t} D_{\mathbf{x}_t \mid \mathbf{z}_t} L_{\mathbf{z}_t \mid \mathbf{x}_{t-1}} p](\mathbf{x}_{t+1}), \tag{A5}$$

$$\Rightarrow L_{\mathbf{x}_t; \mathbf{x}_{t+1} \mid \mathbf{x}_{t-1}} = L_{\mathbf{x}_{t+1} \mid \mathbf{z}_t} D_{\mathbf{x}_t \mid \mathbf{z}_t} L_{\mathbf{z}_t \mid \mathbf{x}_{t-1}} \tag{A6}$$

$$\Rightarrow \int_{\mathbf{x}_t \in \mathcal{X}_t} L_{\mathbf{x}_t; \mathbf{x}_{t+1} \mid \mathbf{x}_{t-1}} d\mathbf{x}_t = \int_{\mathbf{x}_t \in \mathcal{X}_t} L_{\mathbf{x}_{t+1} \mid \mathbf{z}_t} D_{\mathbf{x}_t \mid \mathbf{z}_t} L_{\mathbf{z}_t \mid \mathbf{x}_{t-1}} d\mathbf{x}_t \tag{A7}$$

$$\Rightarrow L_{\mathbf{x}_{t+1} \mid \mathbf{x}_{t-1}} = L_{\mathbf{x}_{t+1} \mid \mathbf{z}_t} L_{\mathbf{z}_t \mid \mathbf{x}_{t-1}} \tag{A8}$$

$$\Rightarrow L_{\mathbf{x}_{t+1} \mid \mathbf{z}_t}^{-1} L_{\mathbf{x}_{t+1} \mid \mathbf{x}_{t-1}} = L_{\mathbf{z}_t \mid \mathbf{x}_{t-1}} \tag{A9}$$

$$\Rightarrow L_{\mathbf{x}_t; \mathbf{x}_{t+1} \mid \mathbf{x}_{t-1}} = L_{\mathbf{x}_{t+1} \mid \mathbf{z}_t} D_{\mathbf{x}_t \mid \mathbf{z}_t} L_{\mathbf{x}_{t+1} \mid \mathbf{z}_t}^{-1} L_{\mathbf{x}_{t+1} \mid \mathbf{x}_{t-1}} \tag{A10}$$

$$\Rightarrow L_{\mathbf{x}_t; \mathbf{x}_{t+1} \mid \mathbf{x}_{t-1}} L_{\mathbf{x}_{t+1} \mid \mathbf{x}_{t-1}}^{-1} = L_{\mathbf{x}_{t+1} \mid \mathbf{z}_t} D_{\mathbf{x}_t \mid \mathbf{z}_t} L_{\mathbf{x}_{t+1} \mid \mathbf{z}_t}^{-1}. \tag{A11}$$

$$\Rightarrow L_{\mathbf{x}_{t+1} \mid \mathbf{z}_t} D_{\mathbf{x}_t \mid \mathbf{z}_t} L_{\mathbf{x}_{t+1} \mid \mathbf{z}_t}^{-1} = (C L_{\mathbf{x}_{t+1} \mid \mathbf{z}_t} P) (P^{-1} D_{\mathbf{x}_t \mid \mathbf{z}_t} P) (P^{-1} L_{\mathbf{x}_{t+1} \mid \mathbf{z}_t}^{-1} C^{-1}) \tag{A12}$$

$$\Rightarrow L_{\mathbf{x}_{t+1} \mid \mathbf{z}_t} = C L_{\mathbf{x}_{t+1} \mid \hat{\mathbf{z}}_t} P, \quad D_{\mathbf{x}_t \mid \mathbf{z}_t} = P^{-1} D_{\mathbf{x}_t \mid \hat{\mathbf{z}}_t} P \tag{A13}$$

947 where

- 948 • in Eq. (A4), we add the integration over  $\mathcal{X}_{t-1}$  in both sides of Eq. (A3). s
- 949 • in Eq. (A5), we replace the probability with operators by using Eq. (2) and Definition 2. Specifically, we have:  $L_{\mathbf{x}_t; \mathbf{x}_{t+1} \mid \mathbf{x}_{t-1}} = \int_{\mathcal{X}_{t-1}} p_{\mathbf{x}_{t+1}}(\mathbf{x}_t, \cdot \mid \mathbf{x}_{t-1}) p(\mathbf{x}_{t-1}) d\mathbf{x}_{t-1}$ .
- 950
- 951 • in Eq. (A9), the operator  $L_{\mathbf{x}_{t+1} \mid \mathbf{z}_t}$  is injective by Assumption 1
- 952 • in Eq. (A10), the  $L_{\mathbf{z}_t \mid \mathbf{x}_{t-1}}$  in Eq. (A6) is substituted by Eq. (A9):
- 953 • in Eq. (A11), if  $L_{\mathbf{x}_{t-1} \mid \mathbf{x}_{t+1}}$  is injective, then  $L_{\mathbf{x}_{t+1} \mid \mathbf{x}_{t-1}}^{-1}$  exists and is densely defined over  $\mathcal{F}(\mathcal{X}_{t+1})$ .
- 954 • in Eq. (A13), Assumption 1 ensures that  $L_{\mathbf{x}_t; \mathbf{x}_{t+1} \mid \mathbf{x}_{t-1}} L_{\mathbf{x}_{t+1} \mid \mathbf{x}_{t-1}}^{-1}$  is bounded; by the uniqueness of spectral decomposition (see e.g., [10] Ch. VII and [12] Theorem XV 4.5),  $L_{\mathbf{x}_{t+1} \mid \mathbf{z}_t} D_{\mathbf{x}_t \mid \mathbf{z}_t} L_{\mathbf{x}_{t+1} \mid \mathbf{z}_t}^{-1}$  admits a unique spectral decomposition in which the eigenvalues, *i.e.*,  $D_{\mathbf{x}_t \mid \mathbf{z}_t}$ , which are precisely the entries of  $\{p_{\mathbf{x}_t \mid \mathbf{z}_t}(\mathbf{x}_t \mid \mathbf{z}_t)\}$ , and eigenfunctions, *i.e.*,  $D_{\mathbf{x}_t \mid \mathbf{z}_t}$ , which columns are  $\{p_{\mathbf{x}_{t+1} \mid \mathbf{z}_t}(\cdot \mid \mathbf{z}_t)\}$ , up to standard indeterminacies.  $C$  is a nonzero scalar rescaling eigenvalues, and  $P$  is a operator permuting the eigenvalues and eigenfunctions.

960 We obtain a unique spectral decomposition in Eq. (A13) with permutation and scaling indeterminacies.  
 961 In the following, we will show how these indeterminacies can be resolved—if not, what informative  
 962 results can still be inferred.

963 First, considering the arbitrary scaling  $C$ , since the normalizing condition

$$\int_{\mathcal{X}_{t+1}} p_{\mathbf{x}_{t+1} \mid \hat{\mathbf{z}}_t} d\mathbf{x}_{t+1} = 1 \tag{A14}$$

964 must hold for every  $\hat{\mathbf{z}}_t$ , one only solution of  $\int_{\mathcal{X}_{t+1}} C p_{\mathbf{x}_{t+1} \mid \mathbf{z}_t} d\mathbf{x}_{t+1} = 1$  is to set  $C = 1$ .

965 Second, regarding the permutation indeterminacy, we start from  $D_{\mathbf{x}_t|\mathbf{z}_t} = P^{-1}D_{\mathbf{x}_t|\hat{\mathbf{z}}_t}P$ . The  
 966 operator,  $D_{\mathbf{x}_t|\mathbf{z}_t}$ , corresponding to the set  $\{p_{\mathbf{x}_t|\mathbf{z}_t}(\mathbf{x}_t | \mathbf{z}_t)\}$  for fixed  $\mathbf{x}_t$  and all  $\mathbf{z}_t$ , admits a unique  
 967 solution ( $P$  only change the entry position):

$$\{p_{\mathbf{x}_t|\mathbf{z}_t}(\mathbf{x}_t | \mathbf{z}_t)\} = \{p_{\mathbf{x}_t|\hat{\mathbf{z}}_t}(\mathbf{x}_t | \hat{\mathbf{z}}_t)\}, \quad \text{for all } \mathbf{z}_t, \hat{\mathbf{z}}_t \quad (\text{A15})$$

968 Due to the set is unordered, the only way to match the R.H.S. with the L.H.S. in a consistent order is to  
 969 exchange the conditioning variables, that is,

$$\{p_{\mathbf{x}_t|\mathbf{z}_t}(\mathbf{x}_t | \mathbf{z}_t^{(1)}), p_{\mathbf{x}_t|\mathbf{z}_t}(\mathbf{x}_t | \mathbf{z}_t^{(2)}), \dots\} = \{p_{\mathbf{x}_t|\hat{\mathbf{z}}_t}(\mathbf{x}_t | \hat{\mathbf{z}}_t^{(1)}), p_{\mathbf{x}_t|\hat{\mathbf{z}}_t}(\mathbf{x}_t | \hat{\mathbf{z}}_t^{(2)}), \dots\} \quad (\text{A16})$$

$$\implies [p_{\mathbf{x}_t|\mathbf{z}_t}(\mathbf{x}_t | \mathbf{z}_t^{(\pi(1))}), p_{\mathbf{x}_t|\mathbf{z}_t}(\mathbf{x}_t | \mathbf{z}_t^{(\pi(2))}), \dots] = [p_{\mathbf{x}_t|\hat{\mathbf{z}}_t}(\mathbf{x}_t | \hat{\mathbf{z}}_t^{(\pi(1))}), p_{\mathbf{x}_t|\hat{\mathbf{z}}_t}(\mathbf{x}_t | \hat{\mathbf{z}}_t^{(\pi(2))}), \dots] \quad (\text{A17})$$

970 where superscript  $(\cdot)$  denotes the index of a conditioning variable, and  $\pi$  is reindexing the conditioning  
 971 variables. We use a relabeling map  $h$  to represent its corresponding value mapping:

$$p_{\mathbf{x}_t|\mathbf{z}_t}(\mathbf{x}_t | h(\mathbf{z}_t)) = p_{\mathbf{x}_t|\hat{\mathbf{z}}_t}(\mathbf{x}_t | \hat{\mathbf{z}}_t), \quad \text{for all } \mathbf{z}_t, \hat{\mathbf{z}}_t. \quad (\text{A18})$$

972 By Assumption 1, different  $\mathbf{z}_t$  corresponds to different  $p_{\mathbf{x}_t|\mathbf{z}_t}(\mathbf{x}_t | \mathbf{z}_t)$ , there is no repeated element  
 973 in  $\{p_{\mathbf{x}_t|\mathbf{z}_t}(\mathbf{x}_t | \mathbf{z}_t)\}$  (and  $\{p_{\mathbf{x}_t|\hat{\mathbf{z}}_t}(\mathbf{x}_t | \hat{\mathbf{z}}_t)\}$ ). Hence, the relabelling map  $h$  is one-to-one (invertible).  
 974 Furthermore, Assumption 4 implies that  $p_{\mathbf{x}_t|\mathbf{z}_t}(\mathbf{x}_t | h(\mathbf{z}_t))$  determines a unique  $h(\mathbf{z}_t)$ . The same  
 975 holds for the  $p_{\mathbf{x}_t|\hat{\mathbf{z}}_t}(\mathbf{x}_t | \hat{\mathbf{z}}_t)$ , implying that

$$p_{\mathbf{x}_t|\mathbf{z}_t}(\mathbf{x}_t | h(\mathbf{z}_t)) = p_{\mathbf{x}_t|\hat{\mathbf{z}}_t}(\mathbf{x}_t | \hat{\mathbf{z}}_t) \implies \hat{\mathbf{z}}_t = h(\mathbf{z}_t). \quad (\text{A19})$$

976 Next, Assumption 1 implies that the function  $h$  must be differentiable. Since the VAE is differentiable,  
 977 we can learn a differentiable function  $h$  that satisfies Assumption 1. Consider  $\hat{\mathbf{z}}_t$  related to  $\mathbf{z}_t$  via  
 978  $\hat{\mathbf{z}}_t = h(\mathbf{z}_t)$ . Then, we have

$$M[p_{\mathbf{x}_t|\hat{\mathbf{z}}_t}(\cdot | \mathbf{z}_t)] = M[p_{\mathbf{x}_t|\mathbf{z}_t}(\cdot | h(\mathbf{z}_t))] = h(\mathbf{z}_t), \quad (\text{A20})$$

979 which is equal to  $\hat{\mathbf{z}}_t$  only if  $h$  is differentiable.

980 To ensure the latent dimension  $d_z$  is also identifiable, we analyze two scenarios :

981 i.  $d_{\hat{z}} > d_z$ :  $d_z$  latent components in  $\hat{\mathbf{z}}_t$  are sufficient to explain  $\mathbf{x}_t$ , i.e.,

$$p(\mathbf{x}_t | \mathbf{z}_t, d_{\hat{z}} - d_z, \mathbf{z}_t^{(1)}, d_{\hat{z}} - d_z) = p(\mathbf{x}_t | \mathbf{z}_t, d_{\hat{z}} - d_z, \mathbf{z}_t^{(2)}, d_{\hat{z}} - d_z), \quad (\text{A21})$$

982 which contradicts the Assumption 1.

983 ii.  $d_{\hat{z}} < d_z$ : This suggests that only  $d_{\hat{z}}$  dimensions are sufficient to reconstruct  $\mathbf{x}_t$ , leaving  $d_z - d_{\hat{z}}$   
 984 components constant, which violates that there are  $d_z$  latent variables.

985 □

986 **More Discussions of Assumption 1** The injectivity of the operator enables us to take inverses of  
 987 certain operators, which is commonly made in nonparametric identification [23, 6, 24]. Intuitively,  
 988 different input distribution corresponds to different output distribution. In the context of the climate  
 989 system, it represents the necessity of temporal variability. However, it is difficult to formalize it in  
 990 terms of functions. We give some examples in terms of  $p_a \Rightarrow p_b$  to make it understandable:

991 **Example 1.**  $b = g(a)$ , where  $g$  is an invertible function.

992 **Example 2.**  $b = a + \epsilon$ , where  $p(\epsilon)$  must not vanish everywhere after the Fourier transform (Theorem  
 993 2.1 in [53]).

994 **Example 3.**  $b = g(a) + \epsilon$ , where the same conditions from Examples 1 and 2 are required.

995 **Example 4.**  $b = g_1(g_2(a) + \epsilon)$ , a post-nonlinear model with invertible nonlinear functions  $g_1, g_2$ ,  
 996 combining the assumptions in **Examples 1-3**.

997 **Example 5.**  $b = g(a, \epsilon)$ , where the joint distribution  $p(a, b)$  follows an exponential family.

998 **Example 6.**  $b = g(a, \epsilon)$ , a general nonlinear formulation. Certain deviations from the nonlinear  
 999 additive model (**Example 3**), e.g., polynomial perturbations, can still be tractable.

### A.3 Component-Wise Identifiability of Latent Variables

**Theorem A1.** (Component-Wise Identifiability of Latent Variables [43]) Let  $\mathbf{c}_t \triangleq \{\mathbf{z}_{t-1}, \mathbf{z}_t\}$  and  $\mathcal{M}_{\mathbf{c}_t}$  be the variable set of two consecutive timestamps and the corresponding Markov network, respectively. Suppose the following assumptions hold:

- i. (Smooth and Positive Density): The probability function of the latent variables  $\mathbf{c}_t$  is smooth and positive, i.e.,  $p_{\mathbf{c}_t}$  is third-order differentiable and  $p_{\mathbf{c}_t} > 0$  over  $\mathbb{R}^{2n}$ .
- ii. (Sufficient Variability)s: Denote  $|\mathcal{M}_{\mathbf{c}_t}|$  as the number of edges in Markov network  $\mathcal{M}_{\mathbf{c}_t}$ . Let

$$w(m) = \left( \frac{\partial^3 \log p(\mathbf{c}_t | \mathbf{z}_{t-2})}{\partial c_{t,1}^2 \partial z_{t-2,m}}, \dots, \frac{\partial^3 \log p(\mathbf{c}_t | \mathbf{z}_{t-2})}{\partial c_{t,2n}^2 \partial z_{t-2,m}} \right) \oplus \left( \frac{\partial^2 \log p(\mathbf{c}_t | \mathbf{z}_{t-2})}{\partial c_{t,1} \partial z_{t-2,m}}, \dots, \frac{\partial^2 \log p(\mathbf{c}_t | \mathbf{z}_{t-2})}{\partial c_{t,2n} \partial z_{t-2,m}} \right) \oplus \left( \frac{\partial^3 \log p(\mathbf{c}_t | \mathbf{z}_{t-2})}{\partial c_{t,i} \partial c_{t,j} \partial z_{t-2,m}} \right)_{(i,j) \in \mathcal{E}(\mathcal{M}_{\mathbf{c}_t})}, \quad (\text{A22})$$

where  $\oplus$  denotes the concatenation operation and  $(i, j) \in \mathcal{E}(\mathcal{M}_{\mathbf{c}_t})$  denotes all pairwise indices such that  $c_{t,i}, c_{t,j}$  are adjacent in  $\mathcal{M}_{\mathbf{c}_t}$ . For  $m \in \{1, \dots, n\}$ , there exist  $4n + 2|\mathcal{M}_{\mathbf{c}_t}|$  different values of  $\mathbf{z}_{t-2,m}$  as the  $4n + 2|\mathcal{M}_{\mathbf{c}_t}|$  values of vector functions  $w(m)$  are linearly independent.

- iii. (Sparse Latent Process): For any  $z_{t,i} \in \mathbf{z}_t$ , the intimate neighbor set of  $z_{t,i}$  is an empty set, where the intimate neighbor set is defined as

**Definition 3.** (Intimate Neighbor Set) Consider a Markov network  $\mathcal{M}_Z$  over variables set  $Z$ , and the intimate neighbor set of variable  $z_{t,i}$  is

$$\Psi_{\mathcal{M}_{\mathbf{c}_t}}(c_{t,i}) \triangleq \left\{ c_{t,j} \mid \begin{array}{l} c_{t,j} \text{ is adjacent to } c_{t,i} \text{ and also adjacent} \\ \text{to all other neighbors of } c_{t,i}, c_{t,j} \in \mathbf{c}_t \setminus \{c_{t,i}\} \end{array} \right\} \quad (\text{A23})$$

- iv. (Transition Variability): For any pair of adjacent latent variables  $z_{t,i}, z_{t,j}$  at time step  $t$ , their time-delayed parents are not identical, i.e.,  $\mathbf{pa}(z_{t,i}) \neq \mathbf{pa}(z_{t,j})$ .

Then for any two different entries  $\hat{c}_{t,k}, \hat{c}_{t,l} \in \hat{\mathbf{c}}_t$  that are **not adjacent** in the Markov network  $\mathcal{M}_{\hat{\mathbf{c}}_t}$  over estimated  $\hat{\mathbf{c}}_t$ ,

- i. The estimated Markov network  $\mathcal{M}_{\hat{\mathbf{c}}_t}$  is isomorphic to the ground-truth Markov network  $\mathcal{M}_{\mathbf{c}_t}$ .
- ii. There exists a permutation  $\pi$  of the estimated latent variables, such that  $z_{t,i}$  and  $\hat{z}_{t,\pi(i)}$  is one-to-one corresponding, i.e.,  $z_{t,i}$  is component-wise identifiable.
- iii. The causal graph of the latent causal process is identifiable.

**Proof Sketch and Discussions.** Once latent space is recovered by Theorem 1, i.e., (i)  $\hat{\mathbf{z}}_t = h_z(\mathbf{z}_t)$  is established, leveraging two properties of latent space—namely, (ii) the sparsity in the latent Markov network, and (iii)  $z_{t,i} \perp\!\!\!\perp z_{t,j} \mid \mathbf{z}_{t-1}, \mathbf{z}_t/[i,j]$  if  $z_{t,i}, z_{t,j}$  ( $i \neq j$ ) are not adjacent in Markov network, we can obtain the component-wise identifiability of latent variables under *sufficient variability* assumption. In contrast to prior work on CRL with component-wise identifiability [94, 43], which typically requires the full invertible mapping  $g$ , and assume multiple distributions or temporal steps while only uses a single measurement for the latent space recovery, our approach fully exploits the temporally adjacent measurements, thereby avoiding the need for strong assumption. Furthermore, we show that using three adjacent time steps, including future observations rather than relying solely on the past, suffices to recover the entire latent process. This temporal window matches that in Theorem 1. Having established the required conditions, we can directly apply the identifiability result from [43] to complete the proof of the identifiable latent causal process.

### A.4 Proof of Lemma 2

**Definition 4.** (Causal Order)  $x_{t,i}$  is in the  $\tau$ -th causal order if only observed variables in the  $(\tau - 1)$ -th causal order directly influence it. We specify  $\mathbf{z}_t$  is in the 0-th causal order.

For an observed variable  $x_{t,i}$ , we define the set  $\mathcal{P}$  to include all variables in  $\mathbf{x}_t$  involved in generating  $x_{t,i}$ , initialized as  $\mathcal{P} = \mathbf{pa}_O(x_{t,i})$ . The upper bound of the cardinality of  $\mathcal{P}$  is given by  $\mathcal{U}(|\mathcal{P}|)$ , which satisfies  $\mathcal{U}(|\mathcal{P}|) = d_x - 1$  initially. Let  $\mathcal{Q}$  denote the set of latent variables, and define the separated set as  $\mathcal{S}$ , where  $g_{s_i}(\mathbf{pa}_L(x_{t,i}), \epsilon_{x_{t,i}})$  is denoted by  $s_{t,i}$ . Initially,  $\mathcal{S} = \{s_{t,i}\}$ . We express  $x_{t,i}$  as  $x_{t,i} = g_i(\mathcal{P}, \mathcal{S}, \mathcal{Q})$ , and traverse all  $x_{t,j} \in \mathbf{x}_t$  in descending causal order  $\tau_j$ , performing the following operations:

1043 i. Remove  $x_{t,j}$  from  $\mathcal{P}$  and apply Eq. (1) to obtain

$$x_{t,i} = f_1(\mathcal{P} \setminus \{x_{t,j}\}, \mathcal{S}, \mathcal{Q}, \mathbf{pa}_O(x_{t,j}), \mathbf{pa}_L(x_{t,j}), s_{t,j}). \quad (\text{A24})$$

1044 Then, update  $\mathcal{P} \leftarrow (\mathcal{P} \setminus \{x_{t,j}\}) \cup \mathbf{pa}_O(x_{t,j})$  and  $\mathcal{Q} \leftarrow \mathcal{Q} \cup \mathbf{pa}_L(x_{t,j})$ . By Assumption 1,  $x_{t,j}$   
 1045 cannot reappear in the set of its ancestors, resulting in  $\mathcal{U}(|\mathcal{P}|) \leftarrow \mathcal{U}(|\mathcal{P}|) - 1$ .

1046 ii. Assumption 1 also ensures that a variable with a lower causal order does not appear in the  
 1047 generation of its descendants. Hence,  $x_{t,j}$  cannot appear in the generation of its descendants,  
 1048 since their causal orders are larger than  $\tau_j$ . Similarly,  $s_{t,j}$ , which is involved in generating  $x_{t,j}$ ,  
 1049 does not appear in the generation of its descendants. Thus,  $s_{t,j} \notin \mathcal{S}$ . Define the new separated  
 1050 set as  $\mathcal{S} \leftarrow \mathcal{S} \cup \{s_{t,j}\}$ , giving

$$x_{t,i} = f_2(\mathcal{P}, \mathcal{S}, \mathcal{Q}), \quad (\text{A25})$$

1051 where the new cardinality is updated as  $|\mathcal{S}| \leftarrow |\mathcal{S}| + 1$ .

1052 Given that  $\mathcal{U}(|\mathcal{P}|) \geq |\mathcal{P}|$ ,  $\mathcal{U}(|\mathcal{P}|)$  ensures that this iterative process can be performed until  $|\mathcal{P}| = 0$ .  
 1053 According to the definition of data generating process, all the aforementioned functions are partially  
 1054 differentiable w.r.t.  $\mathbf{s}_t$  and  $\mathbf{x}_t$ , or they are compositions of such functions. As a result,  $\mathcal{Q} = \mathbf{an}_{\mathbf{z}_t}(x_{t,i})$ ,  
 1055 and there exists a function  $g_{m_i}$  such that

$$x_{t,i} = g_{m_i}(\mathbf{an}_{\mathbf{z}_t}(x_{t,i}), \mathbf{s}_t).$$

1056 Moreover, we observe that  $\mathbf{s}_t$  is in fact the ancestors  $\mathbf{an}_{\epsilon_{\mathbf{x}_t}}(x_{t,i}) = \{\epsilon_{x_{t,j}} \mid s_{t,j} \in \mathcal{S}\}$ , which are  
 1057 implied in this derivation process since  $\epsilon_{x_{t,j}}$  is in one-to-one correspondence with  $s_{t,j}$  through  
 1058 indexing.

## 1059 A.5 Proof of Theorem 2

1060 Considering the mixing function  $m$ , and the functional relation  $s_{t,j} \rightarrow x_{t,i}$ , corresponding  $[\mathbf{J}_m(\mathbf{s}_t)]_{i,j}$ ,  
 1061 where  $i, j$  indicates the row and column index of the Jacobian matrix, respectively.

1062 **For the elements  $i \neq j$ :** If there is a directed functional relationship  $x_{t,j} \rightarrow x_{t,i}$ , the corresponding  
 1063 element of the Jacobian matrix is  $\frac{\partial x_{t,i}}{\partial x_{t,j}}$ . If the relationship is indirect:  $x_{t,j} \dashrightarrow x_{t,i}$ , then for each  
 1064  $x_{t,k} \in \mathbf{pa}_O(x_{t,i})$ , there must exist either an indirect-direct path  $x_{t,j} \dashrightarrow x_{t,k} \rightarrow x_{t,i}$  or a direct-direct  
 1065 path  $x_{t,j} \rightarrow x_{t,k} \rightarrow x_{t,i}$ . In summary, through the chain rule, we obtain

$$[\mathbf{J}_m(\mathbf{s}_t)]_{i,j} = \sum_{x_{t,k} \in \mathbf{pa}_O(x_{t,i})} \frac{\partial x_{t,i}}{\partial x_{t,k}} \cdot \frac{\partial x_{t,k}}{\partial s_{t,j}}. \quad (\text{A26})$$

1066 For each  $x_{t,k} \notin \mathbf{pa}_O(x_{t,i})$ ,  $\frac{\partial x_{t,i}}{\partial x_{t,k}} = 0$ , Eq. (A26) could be rewritten as

$$\begin{aligned} [\mathbf{J}_m(\mathbf{s}_t)]_{i,j} &= \sum_{x_{t,k} \in \mathbf{pa}_O(x_{t,i})} \frac{\partial x_{t,i}}{\partial x_{t,k}} \cdot \frac{\partial x_{t,k}}{\partial s_{t,j}} + \sum_{x_{t,k} \notin \mathbf{pa}_O(x_{t,i})} \frac{\partial x_{t,i}}{\partial x_{t,k}} \cdot \frac{\partial x_{t,k}}{\partial s_{t,j}} \\ &= \sum_{k=1}^{d_x} \frac{\partial x_{t,i}}{\partial x_{t,k}} \cdot \frac{\partial x_{t,k}}{\partial s_{t,j}} = \sum_{k=1}^{d_x} [\mathbf{J}_g(\mathbf{x}_t)]_{i,k} \cdot [\mathbf{J}_m(\mathbf{s}_t)]_{k,j}. \end{aligned} \quad (\text{A27})$$

1067 **For the elements  $i = j$ :** For each  $x_{t,k} \in \mathbf{pa}_O(x_{t,i})$ , DAG structure ensures that  $x_{t,i}$  does not appear  
 1068 in the set of ancestors of itself. Consequently, due to the one-to-one correspondence between  $s_{t,k}$  and  
 1069  $x_{t,i}$ , we also have that  $\frac{\partial x_{t,i}}{\partial s_{t,i}} = 0$ . Thus, we obtain

$$[\mathbf{J}_m(\mathbf{s}_t)]_{i,i} = \frac{\partial x_{t,i}}{\partial s_{t,i}} + 0 = \frac{\partial x_{t,i}}{\partial s_{t,i}} + \sum_{k=1}^{d_x} [\mathbf{J}_g(\mathbf{x}_t)]_{i,k} \cdot [\mathbf{J}_m(\mathbf{s}_t)]_{k,i}. \quad (\text{A28})$$

1070 Since for  $k = i$ , it holds that  $[\mathbf{J}_g(\mathbf{x}_t)]_{i,k} = 0$ , and for  $k \neq i$ , we have  $[\mathbf{J}_m(\mathbf{s}_t)]_{k,i} = 0$ .

1071 Defining  $\mathbf{D}_m(\mathbf{s}_t) = \text{diag}(\frac{\partial x_{t,1}}{\partial s_{t,1}}, \dots, \frac{\partial x_{t,d_x}}{\partial s_{t,d_x}})$ , we can summarize the result as

$$\mathbf{J}_g(\mathbf{x}_t) \mathbf{J}_m(\mathbf{s}_t) = \mathbf{J}_m(\mathbf{s}_t) - \mathbf{D}_m(\mathbf{s}_t). \quad (\text{A29})$$

## 1072 A.6 Proof of Corollary 2.1

1073 Eq. (A29) states that

$$(\mathbf{I}_{d_x} - \mathbf{J}_g(\mathbf{x}_t))\mathbf{J}_m(\mathbf{s}_t) = \mathbf{D}_m(\mathbf{s}_t). \quad (\text{A30})$$

1074 From the DAG structure specified in Condition 1 and the functional faithfulness assumption in  
 1075 Assumption 2, the Jacobian matrix  $\mathbf{J}_g(\mathbf{x}_t)$  can be permuted into a lower triangular form via identical  
 1076 row and column permutations. Thus, the matrix  $\mathbf{I}_{d_x} - \mathbf{J}_g(\mathbf{x}_t)$  is invertible for all  $\mathbf{x}_t \in \mathcal{X}_t$ .

1077 Since  $\mathbf{D}_m(\mathbf{s}_t)$  is obtained via multiplication with  $(\mathbf{I}_{d_x} - \mathbf{J}_g(\mathbf{x}_t))$ , it follows that

$$(\mathbf{I}_{d_x} - \mathbf{J}_g(\mathbf{x}_t))^{-1}\mathbf{D}_m(\mathbf{s}_t) \quad (\text{A31})$$

1078 is well-defined and invertible. This, in turn, implies that  $\mathbf{J}_m(\mathbf{s}_t)$  is invertible.

1079 Furthermore, we establish that

$$\text{supp}(\mathbf{I}_{d_x} - \mathbf{J}_g(\mathbf{x}_t)) = \text{supp}(\mathbf{J}_g(\mathbf{x}_t, \mathbf{s}_t)) \quad (\text{A32})$$

1080 since the diagonal entries of  $\mathbf{J}_g(\mathbf{x}_t, \mathbf{s}_t)$  are nonzero. Given that  $\mathbf{J}_g(\mathbf{x}_t, \mathbf{s}_t)$  inherits the lower triangular  
 1081 structure after permutation, it must also be invertible.

## 1082 A.7 Proof of Theorem 3

1083 We present some useful definitions and lemmas in our proof.

1084 **Definition 5.** (*Ordered Component-wise Identifiability*) Variables  $\mathbf{s}_t \in \mathbb{R}^{d_x}$  and  $\hat{\mathbf{s}}_t \in \mathbb{R}^{d_x}$  are  
 1085 identified component-wise if  $\hat{s}_{t,i} = h_{s_i}(s_{t,\pi(i)})$  with invertible function  $h_{s_i}$  and  $\pi(i) = i$ .

1086 **Lemma 3** (Lemma 1 in LiNGAM [72]). Assume  $\mathbf{M}$  is lower triangular and all diagonal elements  
 1087 are non-zero. A permutation of rows and columns of  $\mathbf{M}$  has only non-zero entries in the diagonal if  
 1088 and only if the row and column permutations are equal.

1089 **Lemma 4** (Proposition in [44]). Suppose that  $\hat{s}_{t,i}$  and  $\hat{s}_{t,j}$  are conditionally independent given  $\hat{\mathbf{z}}_t$ .  
 1090 Then, for all  $\hat{\mathbf{z}}_t$ ,

$$\frac{\partial^2 \log p(\hat{\mathbf{s}}_t | \hat{\mathbf{z}}_t)}{\partial \hat{s}_{t,i} \partial \hat{s}_{t,j}} = 0.$$

1091 *Proof.* Let  $(\hat{\mathbf{z}}_t, \hat{\mathbf{s}}_t, \hat{g}_m)$  be the estimations of  $(\mathbf{z}_t, \mathbf{s}_t, g_m)$ . By Lemma 2,

$$\mathbf{x}_t = g_m(\mathbf{z}_t, \mathbf{s}_t); \quad \hat{\mathbf{x}}_t = \hat{g}_m(\hat{\mathbf{z}}_t, \hat{\mathbf{s}}_t) \quad (\text{A33})$$

1092 Suppose we reconstruct observations well:  $\mathbf{x}_t = \hat{\mathbf{x}}_t$ . Combined with Theorem 1,

$$p(\mathbf{x}_t | \hat{\mathbf{z}}_t) = p(\mathbf{x}_t | h_z(\mathbf{z}_t)) = p(\mathbf{x}_t | \mathbf{z}_t) \implies p(g_m(\mathbf{s}_t, \mathbf{z}_t) | \mathbf{z}_t) = p(\hat{g}_m(\hat{\mathbf{s}}_t, \hat{\mathbf{z}}_t) | \hat{\mathbf{z}}_t). \quad (\text{A34})$$

1093 Corollary 2.1 has shown that  $\mathbf{J}_m(\mathbf{s}_t)$  and  $\mathbf{J}_{\hat{g}_m}(\hat{\mathbf{s}}_t)$  are invertible matrices, by the definition of partial

1094 Jacobian matrix:  $[\mathbf{J}_m(\mathbf{s}_t)]_{i,j} = \frac{\partial x_{t,i}}{\partial s_{t,j}} = \frac{\partial g_{m,i}(\mathbf{s}_t, \mathbf{z}_t)}{\partial s_{t,j}},$

$$\frac{1}{|\mathbf{J}_m(\mathbf{s}_t)|} p(\mathbf{s}_t | \mathbf{z}_t) = \frac{1}{|\mathbf{J}_{\hat{g}_m}(\hat{\mathbf{s}}_t)|} p(\hat{\mathbf{s}}_t | \mathbf{z}_t). \quad (\text{A35})$$

1095 We define  $h_s := m^{-1} \circ \hat{g}_m$  for any fixed  $\mathbf{z}_t$  and  $\hat{\mathbf{z}}_t$ , hence,  $|\mathbf{J}_{h_s}(\hat{\mathbf{s}}_t)| = \frac{|\mathbf{J}_{\hat{g}_m}(\hat{\mathbf{s}}_t)|}{|\mathbf{J}_m(\mathbf{s}_t)|}$  and  $\hat{\mathbf{s}}_t = h_s(\mathbf{s}_t)$ .

1096 Therefore, we have

$$p(\hat{\mathbf{s}}_t | \mathbf{z}_t) = \frac{1}{|\mathbf{J}_{h_s}(\hat{\mathbf{s}}_t)|} p(\mathbf{s}_t | \mathbf{z}_t) \implies \log p(\hat{\mathbf{s}}_t | \mathbf{z}_t) = \log p(\mathbf{s}_t | \mathbf{z}_t) - \log |\mathbf{J}_{h_s}(\hat{\mathbf{s}}_t)|. \quad (\text{A36})$$

1097 The second-order partial derivative of  $\log p(\hat{\mathbf{s}}_t | \mathbf{z}_t)$  w.r.t.  $(\hat{s}_{t,i}, \hat{s}_{t,j})$  is

$$\begin{aligned} \frac{\partial \log p(\hat{\mathbf{s}}_t | \mathbf{z}_t)}{\partial \hat{s}_{t,i}} &= \sum_{k=1}^n \frac{\partial \mathbf{A}_{t,k}}{\partial s_{t,k}} \cdot \frac{\partial s_{t,k}}{\partial \hat{s}_{t,i}} - \frac{\partial \log |\mathbf{J}_{h_s}(\hat{\mathbf{s}}_t)|}{\partial \hat{s}_{t,i}} = \sum_{k=1}^n \frac{\partial \mathbf{A}_{t,k}}{\partial s_{t,k}} \cdot [\mathbf{J}_{h_s}(\hat{\mathbf{s}}_t)]_{k,i} - \frac{\partial \log |\mathbf{J}_{h_s}(\hat{\mathbf{s}}_t)|}{\partial \hat{s}_{t,i}}, \\ \frac{\partial^2 \log p(\hat{\mathbf{s}}_t | \mathbf{z}_t)}{\partial \hat{s}_{t,i} \partial \hat{s}_{t,j}} &= \sum_{k=1}^n \left( \frac{\partial^2 \mathbf{A}_{t,k}}{\partial s_{t,k}^2} \cdot [\mathbf{J}_{h_s}(\hat{\mathbf{s}}_t)]_{k,i} \cdot [\mathbf{J}_{h_s}(\hat{\mathbf{s}}_t)]_{k,j} + \frac{\partial \mathbf{A}_{t,k}}{\partial s_{t,k}} \cdot \frac{\partial [\mathbf{J}_{h_s}(\hat{\mathbf{s}}_t)]_{k,i}}{\partial \hat{s}_{t,j}} \right) - \frac{\partial^2 \log |\mathbf{J}_{h_s}(\hat{\mathbf{s}}_t)|}{\partial \hat{s}_{t,i} \partial \hat{s}_{t,j}}. \end{aligned} \quad (\text{A37})$$

1098 Since for any  $(i, j, t) \in \mathcal{J} \times \mathcal{J} \times \mathcal{T}$ , we have  $s_{t,i} \perp\!\!\!\perp s_{t,j} | \mathbf{z}_t$ , Lemma 4 tells us  $\frac{\partial^2 \log p(\hat{\mathbf{s}}_t | \mathbf{z}_t)}{\partial \hat{s}_{t,i} \partial \hat{s}_{t,j}} = 0$ .

1099 Therefore, its partial derivative w.r.t.  $z_{t,l}$  ( $l \in \mathcal{J}$ ) is always 0:

$$\frac{\partial^3 \log p(\hat{\mathbf{s}}_t | \mathbf{z}_t)}{\partial \hat{s}_{t,i} \partial \hat{s}_{t,j} \partial z_{t,l}} = \sum_{k=1}^n \left( \frac{\partial^3 \mathbf{A}_{t,k}}{\partial s_{t,k}^2 \partial z_{t,l}} \cdot [\mathbf{J}_{h_s}(\hat{\mathbf{s}}_t)]_{k,i} \cdot [\mathbf{J}_{h_s}(\hat{\mathbf{s}}_t)]_{k,j} + \frac{\partial^2 \mathbf{A}_{t,k}}{\partial s_{t,k} \partial z_{t,l}} \cdot \frac{\partial [\mathbf{J}_{h_s}(\hat{\mathbf{s}}_t)]_{k,i}}{\partial \hat{s}_{t,j}} \right) \equiv 0, \quad (\text{A38})$$

1100 since entries of  $\mathbf{J}_{h_s}(\hat{\mathbf{s}}_t)$  do not depend on  $z_{t,l}$ . By Assumption 3, maintaining this equality requires  
 1101  $[\mathbf{J}_{h_s}(\hat{\mathbf{s}}_t)]_{k,i} \cdot [\mathbf{J}_{h_s}(\hat{\mathbf{s}}_t)]_{k,j} = 0$  for  $i \neq j$ , which implies  $\mathbf{J}_{h_s}(\hat{\mathbf{s}}_t)$  is a monomial matrix.

1102 **Eliminate the Permutation Indeterminacy.** We leverage the following properties:

- 1103 1. The inverse of a lower triangular matrix remains a lower triangular matrix.
- 1104 2. A matrix representing a DAG can always be permuted into a lower-triangular form using appropriate row and column permutations.
- 1105 3. Corollary 2.2 states that:

$$\mathbf{J}_{g^L}(\mathbf{x}_t) = \mathbf{I}_{d_x} - \mathbf{D}_{m^L}(\mathbf{s}_t)\mathbf{J}_{m^L}^{-1}(\mathbf{s}_t); \quad \mathbf{J}_g(\mathbf{x}_t) = \mathbf{I}_{d_x} - \mathbf{D}_m(\mathbf{s}_t)\mathbf{J}_m^{-1}(\mathbf{s}_t) \quad (\text{A39})$$

1107 where  $\mathbf{J}_{g^L}(\mathbf{x}_t)$  and  $\mathbf{J}_{m^L}(\mathbf{s}_t)$  are (strictly) lower triangular matrices obtained by permuting  $\mathbf{J}_g(\mathbf{x}_t)$   
 1108 and  $\mathbf{J}_m(\mathbf{s}_t)$ , respectively.  $\mathbf{D}_{m^L}(\mathbf{s}_t)$  is the diagonal matrix extracted from  $\mathbf{J}_{m^L}(\mathbf{s}_t)$ . Consequently,  
 1109 we can express the relationship between  $\mathbf{J}_m(\mathbf{s}_t)$  and  $\mathbf{J}_{m^L}(\mathbf{s}_t)$  as follows:

$$\mathbf{J}_{g^L}(\mathbf{x}_t) = \mathbf{P}_{d_x}\mathbf{J}_g(\mathbf{x}_t)\mathbf{P}_{d_x}^\top \implies \mathbf{J}_m(\mathbf{s}_t) = \mathbf{P}_{d_x}\mathbf{J}_{m^L}(\mathbf{s}_t)\mathbf{D}_{m^L}^{-1}(\mathbf{s}_t)\mathbf{P}_{d_x}^\top \mathbf{D}_m(\mathbf{s}_t), \quad (\text{A40})$$

1110 where  $\mathbf{P}_{d_x}$  is the Jacobian matrix of a permutation function on the  $d_x$ -dimensional vector. Conse-  
 1111 quently, by  $\mathbf{J}_m(\mathbf{s}_t) = \mathbf{J}_{\hat{g}_m}(\hat{\mathbf{s}}_t)\mathbf{J}_{h_s}(\mathbf{s}_t)$ , we obtain

$$\mathbf{J}_{\hat{g}_m}(\hat{\mathbf{s}}_t) = \mathbf{P}_{d_x}\mathbf{J}_{m^L}(\mathbf{s}_t)\mathbf{D}_{m^L}^{-1}(\mathbf{s}_t)\mathbf{P}_{d_x}^\top \mathbf{D}_m(\mathbf{s}_t)\mathbf{J}_{h_s}^{-1}(\mathbf{s}_t), \quad (\text{A41})$$

1112 Using Lemma 3, we obtain  $\mathbf{P}_{d_x}\mathbf{D}_{m^L}^{-1}(\mathbf{s}_t)\mathbf{P}_{d_x}^\top \mathbf{D}_m(\mathbf{s}_t)\mathbf{J}_{h_s}(\hat{\mathbf{s}}_t) = \mathbf{I}_{d_x}$ , which implies  $\mathbf{J}_{h_s}^{-1}(\mathbf{s}_t) =$   
 1113  $\mathbf{D}_m^{-1}(\mathbf{s}_t)\mathbf{D}_{m^L}(\mathbf{s}_t)$ , a diagonal matrix. Consequently,  $\mathbf{J}_{\hat{g}_m}(\hat{\mathbf{s}}_t)$  and  $\mathbf{J}_m(\mathbf{s}_t)$  have the same support,  
 1114 meaning  $\mathbf{J}_{\hat{g}}(\hat{\mathbf{x}}_t)$  and  $\mathbf{J}_g(\mathbf{x}_t)$  share the same support as well, according to Corollary 2.2. Thus, by  
 1115 Assumption 2, the structure of the observational causal graph is identifiable.  $\square$

1116 **Discussion on Assumptions.** To enhance understanding of our theoretical results, we provide some  
 1117 explanations of the assumptions, their connections to real-world scenarios, as well as the potential  
 1118 boundaries of theoretical results.

- 1119 i. **Generation Variability.** Sufficient changes on generation 3 is widely used in identifiable nonlinear  
 1120 ICA/causal representation learning [27, 39, 32, 94, 86]. In practical climate science, it has been  
 1121 demonstrated that, within a given region, human activities ( $s_{t,i}$ ) are strongly impacted by certain  
 1122 high-level climate latent variables  $\mathbf{z}_t$  [1], following a process with sufficient changes [51].
- 1123 ii. **Functional faithfulness.** Functional faithfulness corresponds to the *edge minimality* [91, 42, 60]  
 1124 for the Jacobian matrix  $\mathbf{J}_g(\mathbf{x}_t)$  representing the nonlinear SEM  $\mathbf{x}_t = g(\mathbf{x}_t, \mathbf{z}_t, \epsilon_{\mathbf{x}_t})$ , where  
 1125  $\frac{\partial x_{t,j}}{\partial x_{t,i}} = 0$  implies no causal edge, and  $\frac{\partial x_{t,j}}{\partial x_{t,i}} \neq 0$  indicates causal relation  $x_{t,i} \rightarrow x_{t,j}$ . This  
 1126 assumption is fundamental to ensuring that the Jacobian matrix reflects the true causal graph.  
 1127 If our functional faithfulness is violated, the results can be misleading, but in theory (classical)  
 1128 faithfulness [75] is generally possible as discussed in [42] (2.3 Minimality). As a weaker version  
 1129 of it, edge minimality holds the same property. If needed, violations of faithfulness can be testable  
 1130 except in the triangle faithfulness situation [91]. As opposed to classical faithfulness [75], for  
 1131 example, this is not an assumption about the underlying world, but a convention to avoid redundant  
 1132 descriptions.

## 1133 A.8 Proof of Lemma 1

1134 (We delay the section of this proof since it relies on previous results.) The injectivity of a operator is  
 1135 formally characterized by the completeness of the conditional density function  $p(a | b)$  used in the  
 1136 operator, as defined below.

1137 **Definition 6** (Completeness). *A family of conditional density functions  $p_{A|B}$  is said to be complete if*  
 1138 *the only solution to  $\int_A p(a)p_{a|b}(a | b) da = 0, \forall b \in \mathcal{B}$  is  $p(a) = 0$ .*

1139 Since the transformation from  $\mathbf{s}_t$  to  $\mathbf{x}_t$  is invertible and deterministic, given a  $\hat{\mathbf{s}}_t \in \mathcal{S}_t$ , the probability  
 1140 density function for  $\mathbf{x}_t$  can be expressed as:  $p(\mathbf{x}_t) = \begin{cases} \frac{1}{|\mathbf{J}_m(\mathbf{s}_t)|}p(\mathbf{s}_t), & \mathbf{x}_t = m(\mathbf{s}_t) \\ 0, & \mathbf{x}_t \neq m(\mathbf{s}_t) \end{cases}$ . Hence, the  
 1141 conditional probability can be represented using the Dirac delta function:

$$p(\mathbf{x}_t | \mathbf{s}_t) = \delta(\mathbf{x}_t - m(\mathbf{s}_t)) \implies p(\mathbf{x}_t) = L_{\mathbf{x}_t|\mathbf{s}_t} \circ p(\mathbf{s}_t) = \int_{\mathcal{S}_t} \delta(\mathbf{x}_t - m(\mathbf{s}_t))p(\mathbf{s}_t) d\mathbf{s}_t.$$

1142 By recalling Eq. (2), we can rewrite  $p(\mathbf{x}_t)$  in terms of the operator  $L_{\mathbf{x}_t|\mathbf{s}_t}$  acting on  $p_{\mathbf{s}_t}$ . We consider  
 1143  $p(\mathbf{x}_t | \mathbf{s}_t)$  as an infinite-dimensional vector, and the operator  $L_{\mathbf{x}_t|\mathbf{s}_t}$  as an infinite-dimensional matrix  
 1144 where

$$L_{\mathbf{x}_t|\mathbf{s}_t} = [\delta(\mathbf{x}_t - m(\mathbf{s}_t))]_{\mathbf{x}_t \in \mathcal{X}_t}^\top.$$



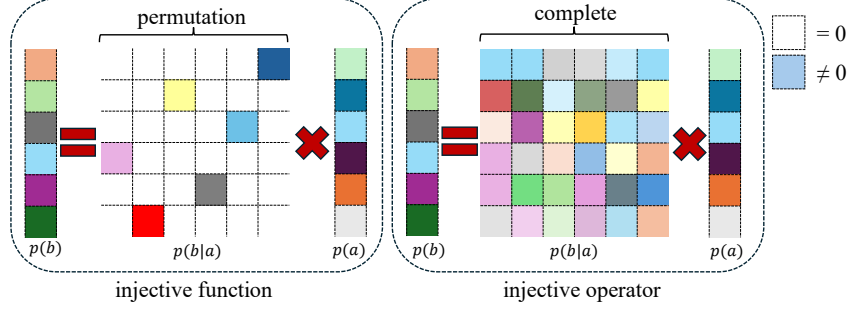

Figure A7: **Invertible Function v.s. Injective Operator.** (Left) Consider two variables  $a$  and  $b$  connected by the function  $b = g(a)$ , where  $g$  is invertible. (Right) Alternatively, their relationship can be expressed as  $p(b) = L_{b|a} \circ p(a)$ , where  $L_{b|a}$  is an injective operator. The grid represents  $p(b | a)$ , with color indicating non-zero values and white representing zero. Intuitively, in the discrete case, a full-rank matrix corresponds to this relationship.

By Corollary 2.2, since  $\mathbf{J}_m(\mathbf{s}_t)$  is invertible, for any two different points  $\mathbf{s}_t^{(1)}, \mathbf{s}_t^{(2)} \in \mathcal{S}_t$  ( $\mathbf{s}_t \neq \mathbf{s}_t'$ ), we have  $m(\mathbf{s}_t^{(1)}) \neq m(\mathbf{s}_t^{(2)})$ . This implies that the supports of  $\delta(\mathbf{x}_t - m(\mathbf{s}_t^{(1)}))$  and  $\delta(\mathbf{x}_t - m(\mathbf{s}_t^{(2)}))$  are disjoint. Thus,  $[\delta(\mathbf{x}_t - m(\mathbf{s}_t))]_{\mathbf{x}_t \in \mathcal{X}_t}^\top$  preserves a one-to-one correspondence across the  $\mathcal{X}_t$ , ensuring:

$$\text{null } [\delta(\mathbf{x}_t - m(\mathbf{s}_t))]_{\mathbf{x}_t \in \mathcal{X}_t}^\top = \{0^{(\infty)}\},$$

which denotes the completeness of  $L_{\mathbf{x}_t|\mathbf{s}_t}$  stated in Definition 6, indicating that  $L_{\mathbf{x}_t|\mathbf{s}_t}$  is injective. The visualization in Figure A7 highlights why Assumption 1 is significantly less restrictive than the invertibility assumption adopted in most of the previous CRL literature [28, 29, 31, 34, 94, 43].

## A.9 Comparison with Existing Methods

Our method targets the joint identification of latent causal graphs and observational causal structures in time series. This is essential for domains such as climate science, where latent processes govern observed dynamics. In contrast, IDOL [43] focuses solely on recovering latent variables and assumes a deterministic mixing function without any causal relations among observed variables. As a result, it cannot recover the observational causal graph and fails in contexts like climate systems, where both latent and observational structures are crucial.

Prior works [54, 64] use nonlinear ICA to recover causal relations among observed variables, assuming known domain variables and non-i.i.d. data. However, (1) CaDR does not require predefined domain variables and instead leverages contextual information to infer latent variables as conditional priors; (2) ICA-based methods are not robust under latent confounding, as spurious correlations may obscure true causal links; (3) they do not identify the latent variables or their underlying dynamics; (4) they require invertibility of  $g$  and  $m$ , an assumption we relax in Corollary 2.1.

The FCI algorithm [74] allows for latent confounding and uses conditional independence tests to infer causal relations among observed variables. However, it cannot recover the latent variables themselves or their causal influence on observations. Furthermore, the causal structure is expressed as a Partial Ancestral Graph (PAG), which represents an equivalence class and may contain ambiguous or uncertain edges. Such ambiguity is particularly problematic for applications like climate analysis, which demand interpretable and stable causal structures.

## B Related Work

### B.1 Climate Analysis

Climate analysis is learning to address the complex, nonlinear, and high-dimensional nature of Earth system dynamics. A prominent line of work focuses on using neural networks for weather and climate forecasting, including data-driven models such as FourCastNet [58] and GraphCast [41], which demonstrate remarkable predictive performance by modeling spatiotemporal dependencies. However, these methods often lack interpretability and fail to reveal the underlying causal mechanisms driving climate variability. To address this issue, recent research has integrated causal discovery into climate science. For instance, [68] introduces causal inference frameworks tailored to climate time series, incorporating techniques such as PCMCi to infer lagged and contemporaneous dependencies. Other

approaches employ structural causal models (SCMs) for identifying interactions between climate variables under interventions [63]. Beyond shallow models, efforts have emerged to disentangle latent variables in high-dimensional climate data using variational autoencoders [35]. While effective, most of these methods do not guarantee identifiability or robust generalization across regimes. More recently, hybrid models that couple dynamical systems theory with deep learning have shown promise in capturing climate processes with greater fidelity. Examples include integrating physics-based constraints into latent state-space models [4] and learning interpretable representations for climate variability modes such as the Madden-Julian Oscillation [77]. These works highlight the growing interest in combining structure learning, causal inference, and deep latent modeling to move beyond black-box predictions towards actionable scientific understanding.

## 1190 B.2 Causal Representation Learning

Achieving causal representations for time series data [61] often relies on nonlinear ICA to recover latent variables with identifiability guarantees [85, 71]. Classical ICA methods assume a linear mixing function between latent and observed variables [9]. To move beyond this linearity assumption, recent advances in nonlinear ICA have established identifiability under various alternative assumptions, including the use of auxiliary variables or structural sparsity [97, 30, 27]. One prominent line of work introduces auxiliary variables to facilitate identifiability. For instance, [32] achieves identifiability by assuming latent sources follow an exponential family distribution and incorporating side information such as domain, time, or class labels [28, 29, 31]. To relax the exponential family requirement, [36] establishes component-wise identifiability using  $2n + 1$  auxiliary variables for  $n$  latent components. Another direction pursues identifiability in a fully unsupervised setting by leveraging structural sparsity. [39] propose a sparsity-based inductive bias to disentangle latent causal factors, demonstrating identifiability in multi-task learning and related settings. They further extend these results to establish identifiability up to a consistency class [38], allowing partial disentanglement. Complementarily, [97] and [94, 43] exploit sparse latent structures under distributional shifts to obtain identifiability results without relying on auxiliary information.

## 1206 B.3 Causal Discovery.

Existing causal discovery methods in climate analysis primarily build on extensions of PCMCi [69], which effectively captures time-lagged and instantaneous linear dependencies, and its nonlinear variant [67]. However, both approaches assume fully observed systems and neglect latent variables, limiting their applicability to complex climate dynamics. Recent causal representation learning methods motivated by climate science attempt to address this gap: [?] imposes strong identifiability assumptions via single-node structures, while [84] adopts an ODE-based model to study climate-zone classification, though these methods often overlook dependencies among observed variables. Beyond climate, a class of nonlinear causal discovery methods leverages Jacobian information for identifiability and acyclicity [37, 65], including applications to structural equation models [2], Markov structures [96], independent mechanisms [17], and non-i.i.d. settings [64]. While [11] propose a general framework that accounts for hidden variables by using rank conditions on the observed covariance matrix, their model is restricted to linear relationships and cannot recover nonlinear latent dynamics in time-series data. In contrast, our method, CaDRe, recovers latent causal structures under nonlinear dependencies, though it currently does not support cases where observed variables act as causes of latent ones—a limitation we leave to future work. Considering the nonlinear CD based on continuous optimization, we additionally provide the Table A6 for comparison.

## 1223 B.4 Time-Series Forecasting

Time series forecasting has seen rapid progress with deep learning methods that leverage various neural architectures. RNN-based models [21, 40, 70] focus on sequential dependencies, while CNN-based approaches [3, 79, 81] capture local temporal patterns. State-space models [19, 18, 20] offer structured modeling of latent dynamics. Transformer-based methods [99, 82, 57] further advance long-range forecasting through attention mechanisms. However, most existing methods neglect instantaneous dependencies among variables, limiting their ability to fully capture the joint dynamics of multivariate time series.

Table A6: Comparison of different methods based on their properties in function type ( $f$ ), data, Jacobian ( $J$ ), capability of performing Causal Discovery (CD) and Causal Representation Learning (CRL), and whether they achieve identifiability.

| Method                | $f$          | Data            | $J$                      | CD | CRL | Identifiability |
|-----------------------|--------------|-----------------|--------------------------|----|-----|-----------------|
| LiNGAM [72]           | Linear       | Non-Gaussian    | $J_{f^{-1}}$             | ✓  | ✗   | ✓               |
| GraN-DAG [37]         | Additive     | Gaussian        | $J_{f^{-1}}$             | ✓  | ✗   | ✗               |
| IMA [17]              | IMA          | All             | $J_f$                    | ✗  | ✗   | ✓               |
| G-SCM [96]            | Sparse       | All             | $J_f$                    | ✗  | ✗   | ✓               |
| Score-Based FCMs [65] | Additive     | Gaussian        | $J_{\nabla_x \log p(x)}$ | ✓  | ✗   | ✗               |
| DynGFN [2]            | Cyclic (ODE) | All             | $J_f$                    | ✓  | ✗   | ✗               |
| JCD [64]              | All          | Assums. 2, F. 1 | $J_{f^{-1}}$             | ✓  | ✗   | ✓               |
| CausalScore [47]      | Mixed        | Gaussian        | $J_{\nabla_x \log p(x)}$ | ✓  | ✗   | Partial         |
| CaDRe (Ours)          | All          | All             | $J_{f^{-1}}$             | ✓  | ✓   | ✓               |

## C Experiment Details

### C.1 On Simulation Dataset

**Data Simulation.** We generate time series data with latent variables  $\mathbf{z}_t \in \mathbb{R}^{d_z}$  and observed variables  $\mathbf{x}_t \in \mathbb{R}^{d_x}$ , where  $d_z \leq d_x$ . The latent dynamics follow a leaky non-linear autoregressive model:

$$\mathbf{z}_t = \sigma \left( \sum_{\ell=1}^L \mathbf{W}^{(\ell)} \mathbf{z}_{t-\ell} \right) + \boldsymbol{\epsilon}_t^z, \quad \boldsymbol{\epsilon}_t^z \sim \mathcal{N}(0, \sigma_z^2 \mathbf{I}), \quad (\text{A42})$$

where  $\sigma(\cdot)$  is leaky ReLU, and  $\mathbf{W}^{(\ell)}$  are lag- $\ell$  transition matrices modulated by class-specific parameters. Instantaneous causal relations among  $\mathbf{x}_t$  are defined by an Erdős-Rényi DAG  $\mathbf{B} \in \{0, 1\}^{d_x \times d_x}$ , with time-varying edge weights:

$$\mathbf{B}_t = \alpha(t) \cdot \mathbf{B}, \quad \alpha(t) = a_1 \cos \left( \frac{2\pi t}{T} \right) + a_2. \quad (\text{A43})$$

The observed variable  $\mathbf{x}_t$  is first generated by a multilayer mixing of  $(\mathbf{z}_t, \mathbf{s}_t)$ , followed by additive and autoregressive noise:

$$\mathbf{x}_t = f_{\text{mix}}(\mathbf{z}_t, \mathbf{s}_t) + \mathbf{s}_t, \quad \mathbf{s}_t = \boldsymbol{\epsilon}_t^x + f_{\text{dep}}(\mathbf{x}_{t-1}), \quad (\text{A44})$$

where  $\boldsymbol{\epsilon}_t^x \sim \mathcal{U}[0, \sigma_x]$ . Then, causal effects among observed variables are injected based on  $\mathbf{B}_t$  in topological order:

$$x_{t,i} \leftarrow x_{t,i} + \sum_{j \in \text{pa}(i)} B_{t,j,i} \cdot x_{t,j}, \quad (\text{A45})$$

where  $\text{pa}(i) = \{j \mid B_{t,j,i} \neq 0\}$  are the causal parents of variable  $i$  under  $\mathbf{B}_t$ .

**Various Datasets.** We generate simulated time-series data using the fixed latent causal process described in Eq. (1) and illustrated in Figure 1. To comprehensively evaluate our theoretical results, we construct synthetic datasets with varying observed dimensionalities, including  $d_x = 3, 6, 8, 10, 100^{*1}$  and latent dimensionalities  $d_z = 2, 3, 4$ , specified for each experiment. Additionally, we simulate different levels of structural sparsity in the latent process under three regimes: *Independent*, *Sparse*, and *Dense*. For evaluation, we use SHD, TPR, Precision, and Recall for causal structure recovery, and MCC and  $R^2$  for assessing latent representation identifiability. As defined in Eq. (1), under the *Independent* setting for the latent temporal process and dependent noise variable  $\mathbf{s}_t$ , we use the generation process from [86], meaning there are no instantaneous dependencies within the  $\mathbf{z}_t$ . For *Sparse* and *Dense* settings, we gradually increase the graph degree after removing diagonals. Each independent noise is sampled from normal distributions.

<sup>1\*</sup> indicates the use of a masking scheme simulated from geographical information (see Appendix C.1)

1255 **Evaluation Metrics.** We evaluate the recovery of latent variables and causal structures using the  
 1256 following metrics:

- 1257 i. **Latent Space Recovery.** Following the identifiability result in Theorem 1, we measure the  
 1258 alignment between the estimated latent variables  $\hat{\mathbf{z}}_t$  and the true latent variables  $\mathbf{z}_t$  using the  
 1259 coefficient of determination  $R^2$ , where  $R^2 = 1$  indicates perfect alignment. A nonlinear  
 1260 mapping is estimated using kernel regression with a Gaussian kernel.
- 1261 ii. **Latent Component Recovery.** To evaluate component-wise identifiability as discussed in  
 1262 Theorem A1, we use the Spearman Mean Correlation Coefficient (MCC), which assesses the  
 1263 monotonic relationship between estimated and true latent components.
- 1264 iii. **Latent Causal Structure.** For evaluating the recovery of latent causal graphs, both instantaneous  
 1265 and time-lagged, we compute the Structural Hamming Distance (SHD) between the learned  
 1266 and true adjacency matrices. Given the permutation indeterminacy of latent variables, we align  
 1267 the estimated latent causal structures  $\mathbf{J}_r(\hat{\mathbf{z}}_t)$  and  $\mathbf{J}_r(\hat{\mathbf{z}}_{t-1})$  with the ground truth by applying  
 1268 consistent permutations.
- 1269 iv. **Observational Source Recovery.** As a surrogate for evaluating the observational causal graph,  
 1270 we use MCC [32] to assess the recovery of  $\mathbf{s}_t$ . Unlike latent variables, this metric does not allow  
 1271 permutations and reflects the identifiability condition stated in Theorem 3.
- 1272 v. **Causal Structure Accuracy.** The recovered latent and observational causal DAGs are also  
 1273 evaluated using SHD, normalized by the total number of possible edges to facilitate comparison  
 1274 across different graph sizes.
- 1275 vi. **Graph-Level Metrics.** In addition to SHD, we report true positive rate (TPR), precision, and F1  
 1276 score to benchmark our method against constraint-based approaches in causal graph recovery.

1277 **Implementation Details of CRL Baselines.** We employed publicly available implementations  
 1278 for TDRL, CaRiNG, and iCRITIS, which cover most of the baselines used in our experiments.  
 1279 For G-CaRL, whose official code was not released, we re-implemented the method based on the  
 1280 descriptions in the original paper. Furthermore, because the original iCRITIS framework was tailored  
 1281 for image-based inputs, we adapted it to our setting by replacing its encoder and decoder with a VAE  
 1282 architecture, using the same hyperparameters as in CaDRe.

1283 **Mask by Inductive Bias.** Continuous optimization faces challenges like local minima [56, 52],  
 1284 making it difficult to scale to higher dimensions. However, incorporating prior knowledge on the low  
 1285 probability of certain dependencies [75, 69] enables us to compute a mask. To validate this approach  
 1286 using physical laws as observed DAG initialization C.2 in climate data, we mask 75% of the lower  
 1287 triangular elements in a simulation with  $d_x = 100$ , a ratio much lower than in real-world applications.

1288 **Comparison with Constraint-Based Methods.** We compare our method against a series of  
 1289 constraint-based causal discovery algorithms, which rely on Conditional Independence (CI) tests  
 1290 without assuming a specific form for the SEMs. These approaches are nonparametric and model-  
 1291 agnostic, but they typically return equivalence classes of graphs rather than fully identifiable structures.  
 1292 For instance, FCI outputs Partial Ancestral Graphs (PAGs), while CD-NOD returns equivalence  
 1293 classes reflecting causal ambiguity under the observed CI constraints. For a fair comparison, we  
 1294 adopt near-optimal configurations of the most representative constraint-based methods. Specifically,  
 1295 we use the Causal-learn package [95] to implement FCI and CD-NOD, and the Tigramite  
 1296 library [69] for PCMCI and LPCMCI. Each method is run under recommended hyperparameter  
 1297 settings as reported in their respective documentation or prior studies, ensuring a reliable and balanced  
 1298 comparison.

- 1299 i. **FCI:** We use Fisher’s Z conditional independence test. For the obtained PAG, we enumerate all  
 1300 possible adjacency matrices and select the one closest to the ground truth by minimizing the  
 1301 SHD.
- 1302 ii. **CD-NOD:** We concatenate the time indices  $[1, 2, \dots, T]$  of the simulated data into the observed  
 1303 variables and only consider the edges that exclude the time index. We use kernel-based CI test  
 1304 since it demonstrates superior performance here. We consider all obtained equivalence classes  
 1305 and select the result that minimizes SHD relative to the ground truth.
- 1306 iii. **PCMCI:** We use partial correlation as the metric of the conditional independence test. We  
 1307 enforce no time-lagged relationships in PCMCI and run it to focus exclusively on contempo-  
 1308 raneous (instantaneous) causal relationships. In the Tigramite library, this can be achieved

by setting the maximum time lag  $\tau_{\max}$  to zero. This effectively disables the search for lagged causal dependencies. We select contemporary relationships as the ultimate result.

iv. **LPCMCI**: Similarly to PCMCI, we use partial correlation as the metric of CI test, and select the contemporary relationships as the obtained causal graph.

**Study on Dimension of Latent Variables.** We fix  $d_x = 6$  and vary  $d_z = \{2, 3, 4\}$  as shown in Table A7. The results indicate that both the Markov network and time-lagged structure are identifiable for lower dimensions. However, as the latent dimension increases, it witnesses a decline in the MCC, which is still the challenge in the continuous optimization of latent process identification [94, 43]. Nevertheless, the identifiability of latent space ( $R^2$ ) remains satisfied across different settings.

Table A7: **Results on Different Latent Dimensions.** We run simulations with 5 random seeds, selected based on the best-converged results to avoid local minima.

| $d_x$ | $d_z$ | SHD ( $\mathcal{G}_{x_t}$ ) | TPR                 | Precision           | MCC ( $s_t$ )         | MCC ( $z_t$ )         | SHD ( $\mathcal{G}_{z_t}$ ) | SHD ( $\mathcal{M}_{lag}$ ) | $R^2$               |
|-------|-------|-----------------------------|---------------------|---------------------|-----------------------|-----------------------|-----------------------------|-----------------------------|---------------------|
| 6     | 2     | 0.12 ( $\pm 0.04$ )         | 0.86 ( $\pm 0.02$ ) | 0.85 ( $\pm 0.04$ ) | 0.9864 ( $\pm 0.01$ ) | 0.9741 ( $\pm 0.03$ ) | 0.15 ( $\pm 0.03$ )         | 0.21 ( $\pm 0.05$ )         | 0.95 ( $\pm 0.01$ ) |
|       | 3     | 0.18 ( $\pm 0.06$ )         | 0.83 ( $\pm 0.02$ ) | 0.80 ( $\pm 0.04$ ) | 0.9583 ( $\pm 0.02$ ) | 0.9505 ( $\pm 0.01$ ) | 0.24 ( $\pm 0.06$ )         | 0.33 ( $\pm 0.09$ )         | 0.92 ( $\pm 0.01$ ) |
|       | 4     | 0.23 ( $\pm 0.02$ )         | 0.80 ( $\pm 0.06$ ) | 0.74 ( $\pm 0.01$ ) | 0.9041 ( $\pm 0.02$ ) | 0.8931 ( $\pm 0.03$ ) | 0.33 ( $\pm 0.03$ )         | 0.48 ( $\pm 0.05$ )         | 0.91 ( $\pm 0.02$ ) |

Table A8: **Assumption Ablation Study.** These results verify the necessity of our assumptions in the theoretical analysis.

| Setting  | MCC ( $s_t$ ) | $R^2$ |
|----------|---------------|-------|
| <b>A</b> | 0.6328        | 0.34  |
| <b>B</b> | 0.7563        | 0.67  |
| <b>C</b> | 0.7052        | 0.85  |

**Ablation Study on Conditions.** We further conduct simulation studies to validate the theoretical identifiability guarantees under controlled settings with latent dimension  $d_z = 3$  and observation dimension  $d_x = 6$ . To explicitly assess the necessity of key assumptions in our theory, we intentionally remove specific conditions, which are critical to the identifiability results. The following cases illustrate three distinct violations:

- i. **A** (Violation of contextual measurement condition in Theorem 1): We enforce conditional independence among  $z_t$  and replace the latent transition with an orthogonal mapping, thereby violating the 3-measurement condition required for block identifiability [23].
- ii. **B** (Violation of Assumption 1): To violate the injectivity of linear operators, we use a simple autoregressive process  $z_t = z_{t-1} + \epsilon_{z_t}$  with  $\epsilon_{z_t} \sim \text{Uniform}(0, 1)$ , which fails the injectivity requirement for  $L_{z_t|z_{t-1}}$  and  $L_{x_{t-1}|x_{t+1}}$  [53].
- iii. **C** (Violation of Assumption 3): We constrain the generation variability by setting  $s_t = q(z_t) + \epsilon_{x_t}$ , where  $q$  is a fixed mixing function and  $\epsilon_{x_t} \sim \mathcal{N}(0, \mathbf{I}_{d_x})$ . This results in a linear Gaussian model without heteroscedasticity, undermining the necessary distributional variability, as discussed in [86].

As shown in Table A8, the removal of these assumptions leads to a substantial drop in both  $R^2$  and MCC for  $s_t$ , indicating a failure to recover the latent space and the observation-level causal structure. These findings empirically substantiate the necessity of our theoretical assumptions and delineate the conditions under which identifiability breaks down.

**Hyperparameter Sensitivity.** We test the hyperparameter sensitivity of CaDRe w.r.t. the sparsity and DAG penalty, as these hyperparameters have a significant influence on the performance of structure learning. In this experiment, we set  $d_z = 3$  and  $d_x = 6$ . As shown in Table A9, the results demonstrate robustness across different settings, although the performance of structure learning is particularly sensitive to the sparsity constraint.

## C.2 On Real-world Dataset

### Dataset Description.

Table A9: **Hyperparameter Sensitivity.** We run experiments using 5 different random seeds for data generation and estimation procedures, reporting the average performance on evaluation metrics. "/" indicates loss of explosion. Notably, an excessively large DAG penalty at the beginning of training can result in a loss explosion or the failure of convergence.

| $\alpha$ | $1 \times 10^{-5}$ | $5 \times 10^{-5}$ | $1 \times 10^{-4}$ | $5 \times 10^{-4}$ | $1 \times 10^{-3}$ | $1 \times 10^{-2}$ |
|----------|--------------------|--------------------|--------------------|--------------------|--------------------|--------------------|
| SHD      | 0.23               | 0.22               | 0.18               | 0.27               | 0.32               | 0.67               |
| $\beta$  | $1 \times 10^{-5}$ | $5 \times 10^{-5}$ | $1 \times 10^{-4}$ | $5 \times 10^{-4}$ | $1 \times 10^{-3}$ | $1 \times 10^{-2}$ |
| SHD      | 0.37               | 0.18               | 0.20               | /                  | /                  | /                  |

Table A10: **Extended Results on Weather Forecasting.** Lower MSE/MAE is better. **Bold** numbers represent the best performance among the models, while underlined numbers denote the second-best.

| Dataset | Length | CaDRe        |              | iTransformer |              | Informer |       | PatchTST |       | DLinear+FAN |       | TimesNet |       | DLinear |       | N-Transformer |       |
|---------|--------|--------------|--------------|--------------|--------------|----------|-------|----------|-------|-------------|-------|----------|-------|---------|-------|---------------|-------|
|         |        | MSE          | MAE          | MSE          | MAE          | MSE      | MAE   | MSE      | MAE   | MSE         | MAE   | MSE      | MAE   | MSE     | MAE   | MSE           | MAE   |
| Weather | 48     | <b>0.125</b> | <b>0.167</b> | <u>0.140</u> | <u>0.179</u> | 0.177    | 0.218 | 0.148    | 0.188 | 0.158       | 0.217 | 0.138    | 0.191 | 0.156   | 0.198 | 0.143         | 0.195 |
|         | 96     | <b>0.157</b> | <b>0.203</b> | <u>0.168</u> | <u>0.214</u> | 0.225    | 0.259 | 0.187    | 0.226 | 0.199       | 0.256 | 0.180    | 0.231 | 0.186   | 0.229 | 0.199         | 0.246 |
|         | 144    | <u>0.180</u> | <b>0.225</b> | <b>0.172</b> | <u>0.225</u> | 0.278    | 0.297 | 0.207    | 0.242 | 0.312       | 0.274 | 0.190    | 0.244 | 0.199   | 0.244 | 0.225         | 0.267 |
|         | 192    | <u>0.207</u> | <b>0.248</b> | <b>0.193</b> | <u>0.241</u> | 0.354    | 0.348 | 0.234    | 0.265 | 0.238       | 0.298 | 0.212    | 0.265 | 0.217   | 0.261 | 2.960         | 0.315 |

- Weather<sup>2</sup> dataset offers 10-minute summaries from an automated rooftop station at the Max Planck Institute for Biogeochemistry in Jena, Germany.
- CESM2 Pacific SST dataset employs monthly Sea Surface Temperature (SST) data generated from a 500-year pre-2020 control run of the CESM2 climate model. The dataset is restricted to oceanic regions, excluding all land areas, and retains its native gridded structure to preserve spatial correlations. It encompasses 6000 temporal steps, representing monthly SST values over the designated period. Spatially, the dataset comprises a grid with 186 latitude points and 151 longitude points, resulting in 28086 spatial variables, including 3337 land points where SST is undefined, and 24749 valid SST observations. To accommodate computational constraints, a downsampled version of the data, reduced to 84 grid points ( $6 \times 14$ ), is utilized in our experiment.
- WeatherBench [62] is a benchmark dataset specifically tailored for data-driven weather forecasting. We specifically selected wind direction data for visualization comparisons within the same period, maintaining the original 350,640 timestamps.

**Extended Weather Forecasting Results.** To show the effectiveness of our approach, we evaluate additional large-scale time series forecasting models on the Weather dataset, a widely used benchmark in this domain. The selected models include iTransformer [48], PatchTST [57], Informer [46], DLinear [90], FAN [88], TimesNet [81], and N-Transformer [49]. As shown in Table A10, their results are reported to provide a comprehensive comparison with our method.

**Initialization of Observational Causal Graph.** To improve the stability of continuous optimization and avoid poor local minima in estimating the causal structure matrix  $\hat{\mathcal{G}}_{\mathbf{x}_t}$ , we incorporate a prior based on the Spatial Autoregressive (SAR) model. The SAR model, widely applied in geography, economics, and environmental science, captures spatial dependencies through the formulation:

$$\mathbf{X} = \mathbf{Z}\beta + \lambda\mathbf{W}\mathbf{X} + \mathbf{E},$$

where  $\mathbf{W}$  is the spatial weights matrix,  $\beta$  is a regression coefficient, and  $\mathbf{E}$  is a noise term. To simplify the model and isolate the spatial interaction component, we set  $\beta = 0$  and  $\lambda = 1$ , resulting in the canonical SAR model:

$$\mathbf{X} = \mathbf{W}\mathbf{X} + \mathbf{E}.$$

The core assumption is that instantaneous interactions between regions are unlikely if they are separated by a substantial spatial distance. Therefore, we initialize  $\mathbf{W}$  using a binary spatial adjacency matrix  $\mathcal{M}_{\text{loc}}$ , defined as

$$[\mathcal{M}_{\text{loc}}]_{i,j} = \mathbb{I}(\|s_i - s_j\|_2 \leq 50),$$

where  $s_i$  and  $s_j$  denote the spatial coordinates of regions  $i$  and  $j$ , respectively. This constraint enforces that only regions within a Euclidean distance of 50 units are considered spatially adjacent.

<sup>2</sup><https://www.bgc-jena.mpg.de/wetter/>



Table A11: Architecture details.  $T$ , length of time series.  $|\mathbf{x}_t|$ : input dimension.  $n$ : latent dimension. LeakyReLU: Leaky Rectified Linear Unit. Tanh: Hyperbolic tangent function.

| Configuration             | Description                   | Output                                   |
|---------------------------|-------------------------------|------------------------------------------|
| $\phi$                    | <b>z-encoder</b>              |                                          |
| Input: $\mathbf{x}_{1:t}$ | Observed time series          | Batch Size $\times T \times d_x$         |
| Dense                     | $d_x$ neurons                 | Batch Size $\times T \times d_x$         |
| Concat zero               | concatenation                 | Batch Size $\times T \times d_x$         |
| Dense                     | $d_z$ neurons                 | Batch Size $\times T \times d_z$         |
| $\eta$                    | <b>s-encoder</b>              |                                          |
| Input: $\mathbf{x}_{1:t}$ | Observed time series          | Batch Size $\times T \times d_x$         |
| Dense                     | $d_x$ neurons                 | Batch Size $\times T \times d_x$         |
| Concat zero               | concatenation                 | Batch Size $\times T \times d_x$         |
| Dense                     | $d_x$ neurons                 | Batch Size $\times T \times d_x$         |
| $\psi$                    | <b>decoder</b>                |                                          |
| Input: $\mathbf{z}_{1:T}$ | Latent Variable               | Batch Size $\times T \times (d_z + d_x)$ |
| Dense                     | $d_x$ neurons, Tanh           | Batch Size $\times T \times d_x$         |
| $r$                       | <b>Modular Prior Networks</b> |                                          |
| Input: $\mathbf{z}_{1:T}$ | Latent Variable               | Batch Size $\times (d_z + 1)$            |
| Dense                     | 128 neurons, LeakyReLU        | $(d_z + 1) \times 128$                   |
| Dense                     | 128 neurons, LeakyReLU        | $128 \times 128$                         |
| Dense                     | 128 neurons, LeakyReLU        | $128 \times 128$                         |
| Dense                     | 1 neuron                      | Batch Size $\times 1$                    |
| Jacobian Compute          | Compute $\log(\det(J))$       | Batch Size                               |

1376 We then estimate  $\lambda$  and update  $\mathbf{W}$  by fitting the linear model  $\mathbf{X} = \mathbf{W}\mathbf{X} + \mathbf{E}$  via least squares. The  
1377 resulting matrix  $\mathbf{W}$  is used as the initialization for the observational causal graph, denoted  $\mathcal{M}_{\text{init}}$ .

1378 **Compute the Observational Causal Graphs.** Using a mask gradient-based approach, we compute  
1379 an initial estimate of the Jacobian  $\mathbf{J}_{\hat{g}}(\mathbf{x}_t)$ , which encodes local sensitivities. However, these Jacobian  
1380 matrices are typically dense and difficult to interpret directly. To produce a more interpretable visual-  
1381 ization of the observational causal graph, we apply a masking operation followed by elementwise  
1382 thresholding:

$$\hat{\mathcal{G}}_{x_t} = \mathbb{I}(|\mathbf{J}_{\hat{g}}(\mathbf{x}_t) \odot \mathcal{M}_{\text{init}}| > \tau), \quad (\text{A46})$$

1383 where  $\odot$  denotes the elementwise (Hadamard) product, and  $\mathbb{I}(\cdot)$  is the indicator function that outputs 1  
1384 if the condition is true and 0 otherwise. We set the threshold to  $\tau = 0.15$  to obtain a binary adjacency  
1385 matrix.  $\mathcal{M}_{\text{init}}$  is the initialization mask.

1386 To compute the partial Jacobian  $\mathbf{J}_{\hat{g}}(\mathbf{x}_t)$  with respect to  $\mathbf{s}_t$  while keeping  $\mathbf{z}_t$  fixed, we disable gradient  
1387 tracking for  $\mathbf{z}_t$  by setting `requires_grad=False`, and use `autograd.functional.jacobian` in  
1388 PyTorch.

1389 **Runtime and Computational Efficiency.** We report the computational cost of the different meth-  
1390 ods considered. The comparison considers metrics including training time, memory usage, and  
1391 corresponding performance MSE in the forecasting task. Note that inference time is not included in  
1392 the comparison, as our work focuses on causal structure learning through continuous optimization  
1393 rather than constraint-based methods. Figure A8 shows that our CaDRe method simultaneously  
1394 learns the causal structure while achieving the lowest MSE, highlighting the importance of building a  
1395 transparent and interpretable model. Furthermore, CaDRe exhibits similar training time and memory  
1396 usage compared to mainstream time-series forecasting models in the lightweight track.

1397 **Model Structure** We choose MICN [79] as the encoder backbone of our model on real-world  
1398 datasets. Specifically, given that the MICN extracts the hidden feature, we apply a variational  
1399 inference block and then an MLP-based decoder. Architecture details of the proposed method are  
1400 shown in Table A11.

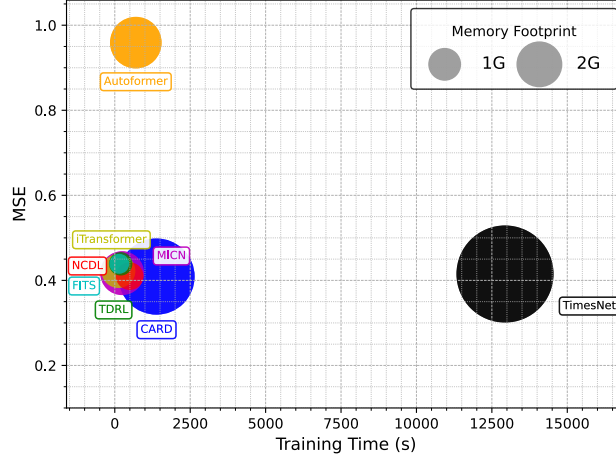

Figure A8: **Comparison of Computational Cost.** Different colors represent different methods, while the size of the circles corresponds to memory usage. The prediction length is set to 96.

## D More Discussions

### D.1 Identifiability of Latent Space in $n$ -order Markov Process

**Theorem A2. (Identifiability of Latent Space in  $n$ -Order Markov Process)** Suppose observed variables and hidden variables follow the data-generating process in Eq. (1), and estimated observations match the true joint distribution of  $\{\mathbf{x}_{t-n}, \dots, \mathbf{x}_{t-1}, \mathbf{x}_t, \dots, \mathbf{x}_{t+n}, \mathbf{x}_{t+n+1}, \dots, \mathbf{x}_{t+2n}\}$  as illustrated in Definition 1. The following assumptions are imposed:

*A1' (Computable Probability:)* The joint, marginal, and conditional distributions of  $(\mathbf{x}_t, \mathbf{z}_t)$  are all bounded and continuous.

*A2' (Contextual Variability:)* The operators  $L_{\mathbf{x}_{t+n+1:t+2n}|\mathbf{z}_{t:t+n}}$  and  $L_{\mathbf{x}_{t-n:t-1}|\mathbf{x}_{t+n+1:t+2n}}$  are injective and bounded.

*A3' (Latent Drift:)* For any  $\mathbf{z}_{t:t+n}^{(1)}, \mathbf{z}_{t:t+n}^{(2)} \in \mathcal{Z}_t$  where  $\mathbf{z}_{t:t+n}^{(1)} \neq \mathbf{z}_{t:t+n}^{(2)}$ , we have  $p(\mathbf{x}_t|\mathbf{z}_{t:t+n}^{(1)}) \neq p(\mathbf{x}_t|\mathbf{z}_{t:t+n}^{(2)})$ .

*A4' (Differentiability:)* There exists a functional  $M$  such that  $M[p_{\mathbf{x}_{t:t+n}|\mathbf{z}_{t:t+n}}(\cdot|\mathbf{z}_{t:t+n})] = h_z(\mathbf{z}_{t:t+n})$  for all  $\mathbf{z}_{t:t+n} \in \mathcal{Z}_{t:t+n}$ , where  $h_z$  is differentiable.

Then we have  $\hat{\mathbf{z}}_{t:t+n} = h_z(\mathbf{z}_{t:t+n})$ , where  $h_z : \mathbb{R}^{d_z \times n} \rightarrow \mathbb{R}^{d_z \times n}$  is an invertible and differentiable function.

If an  $n$ -order Markov process exhibits conditional independence across different time lags, block-wise identifiability of the conditioning variables can still be achieved using  $3n$  measurements. For instance, when the lag is 2, once block-wise identifiability of the joint variables  $[\mathbf{z}_t, \mathbf{z}_{t+1}]$ ,  $[\mathbf{z}_{t-2}, \mathbf{z}_{t-1}]$ , and  $[\mathbf{z}_{t+1}, \mathbf{z}_{t+2}]$  is established, and given the known temporal direction  $\mathbf{z}_t \rightarrow \mathbf{z}_{t+1}$ , one can disambiguate  $\mathbf{z}_t$  and  $\mathbf{z}_{t+1}$  under mild variability assumptions. Subsequently, the same strategy as in Theorem A1 can be applied to achieve component-wise identifiability of  $\mathbf{z}_t$  and  $\mathbf{z}_{t+1}$  by leveraging conditional independencies given  $\mathbf{z}_{t-2}$  and  $\mathbf{z}_{t-1}$ .

### D.2 Allowing Time-Lagged Causal Relationships in Observations

In this section, we demonstrate that our proposed framework is compatible with the consideration of time-lagged effects, by providing *potential solutions*.



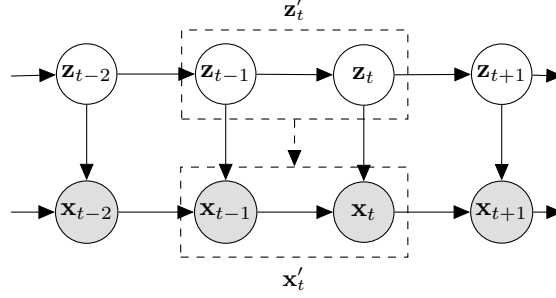

Figure A9: **4-measurement model with time-lagged effects in observed space.**  $x_t$  could be considered as the directed (dominating) measurement of  $z_t$ , and  $x_{t-2}$ ,  $x_{t-1}$ , and  $x_{t+1}$  provide indirect measurements of  $z_t$ . For identifying the time-lagged causal relationships in observed space, we consider  $\mathbf{z}'_t = (z_{t-1}, z_t)$  as the new latent variables, and  $\mathbf{x}'_t = (x_{t-1}, x_t)$  as the new observed variables, to apply our *functional equivalence* in Theorem 2.

#### 1427 D.2.1 Phase I: Identifying Latent Variables from Time-Lagged Causally-Related 1428 Observations

1429 For the identification of latent variables, we adopt the strategy outlined in [6, 24] to construct a  
1430 spectral decomposition. We extend this approach to develop a proof strategy that establishes the  
1431 identifiability of the latent space, as stated in Corollary 2.2.

1432 We begin by defining the 4-measurement model, which includes time-series data with time-lagged  
1433 effects in the observed space as a special case.

1434 **Definition 7** (4-Measurement Model).  $\mathbf{Z} = \{z_{t-2}, z_{t-1}, z_t, z_{t+1}\}$  represents latent variables in four  
1435 continuous time steps, respectively. Similarly,  $\mathbf{X} = \{x_{t-2}, x_{t-1}, x_t, x_{t+1}\}$  are observed variables  
1436 that directly measure  $z_{t-2}, z_{t-1}, z_t, z_{t+1}$  using the same generating functions  $g$ . The model is defined  
1437 by the following properties:

- 1438 • The transformation within  $z_{t-2}, z_{t-1}, z_t, z_{t+1}$  is not measure-preserving.
- 1439 • Joint density of  $x_{t-2}, x_{t-1}, x_t, x_{t+1}, z_t$  is a product measure w.r.t. the Lebesgue measure  
1440 on  $\mathcal{X}_{t-2} \times \mathcal{X}_{t-1} \times \mathcal{X}_t \times \mathcal{X}_{t+1} \times \mathcal{Z}_t$  and a dominating measure  $\mu$  is defined on  $\mathcal{Z}_t$ .
- 1441 • **Limited feedback:**  $p(x_t | x_{t-1}, z_t, z_{t-1}) = p(x_t | x_{t-1}, z_t)$ .
- 1442 • The distribution over  $(\mathbf{X}, \mathbf{Z})$  is Markov and faithful to a DAG.

1443 Limited feedback explicitly assumes that future events do not cause past events and excludes instanta-  
1444 neous effects from  $x_t$  to  $z_t$ . As illustrated in Figure A9,  $x_{t-2}, x_{t-1}, x_t, x_{t+1}$  are defined as different  
1445 measurements of  $z_t$ , forming a temporal structure characteristic of a typical 4-measurement model.  
1446 Under the data-generating process depicted in Figure A9, and based on the assumption of limited  
1447 feedback, we propose the following framework:

$$\begin{aligned}
 p(x_{t-1}, x_t, x_{t+1}, x_{t+2}) &= \int_{\mathcal{Z}_t} p(x_{t+1} | x_t, z_t) p(x_t | x_{t-1}, z_t) p(x_{t-1}, x_{t-2}, z_t) dz_t \\
 &= \int_{\mathcal{Z}_t} p(x_{t+1} | x_t, z_t) p(x_t, x_{t-1}, z_t) p(x_{t-2} | z_t, x_{t-1}) dz_t.
 \end{aligned} \tag{A47}$$

1448 **Discussion of achieving the identifiability of latent space.** Comparing Eq. A47 with Eq. A3,  
1449 which represents the foundational result for proving the identifiability of latent space under the  
1450 3-measurement model, we extend the identification strategy from [6, 24] to the 4-measurement model.  
1451 This forms the critical step in our identification process. We adopt assumptions analogous to those in  
1452 [6, 24] and Theorem 1, and suppose the followings:

- 1453 i. The joint distribution of  $(\mathbf{X}, \mathbf{Z})$  and all their marginal and conditional densities are bounded and  
1454 continuous.
- 1455 ii. The linear operators  $L_{x_{t+1}|x_t, z_t}$  and  $L_{x_{t-2}, x_{t-1}, x_t, x_{t+1}, z_t}$  are injective for bounded function  
1456 space.
- 1457 iii. For all  $z_t, z'_t \in \mathcal{Z}_t$  ( $z_t \neq z'_t$ ), the set  $\{x_t : p(x_t | z_t) \neq p(x_t | z'_t)\}$  has positive probability.

1458 hold true. Similar to the proof of our identifiability of latent space in Section A.2, except for  
1459 the conditional independence introduced by the temporal structure, the key assumptions include

1460 an injective linear operator to enable the recovery of the density function of latent variables and  
 1461 distinctive eigenvalues to prevent eigenvalue degeneracy. The primary difference is the property  
 1462 *limited feedback*, where we can adopt the strategy in [6] to construct a unique spectral decomposition,  
 1463 where  $(\mathbf{x}_{t-2}, \mathbf{x}_{t-1}, \mathbf{x}_t, \mathbf{x}_{t+1}, \mathbf{z}_t)$  correspond to  $(X, S, Z, Y, X^*)$ , respectively.  
 1464 Following this, we apply the key steps of our identification process as detailed in the Appendix A.2.  
 1465 Ultimately, we can establish that the block  $(\mathbf{z}_t, \mathbf{x}_t)$  is identifiable up to an invertible transformation:

$$(\hat{\mathbf{z}}_t, \hat{\mathbf{x}}_t) = h_{x,z}(\mathbf{z}_t, \mathbf{x}_t). \quad (\text{A48})$$

1466 where  $h_{x,z} : \mathbb{R}^{d_x+d_z} \rightarrow \mathbb{R}^{d_x+d_z}$  is an invertible function. Since the observation  $\mathbf{x}_t$  is known and  
 1467 suppose  $\hat{\mathbf{x}}_t = \mathbf{x}_t$ , this relationship indeed represents an invertible transformation between  $\hat{\mathbf{z}}_t$  and  $\mathbf{z}_t$   
 1468 as

$$\hat{\mathbf{z}}_t = h_z(\mathbf{z}_t). \quad (\text{A49})$$

1469 With an additional assumption of a sparse latent Markov network, we achieve component-wise  
 1470 identifiability of the latent variables, as stated in Theorem A1 in appendix, leveraging the proof  
 1471 strategies of [94, 43]. These results are stronger than those in [6].

## 1472 D.2.2 Phase II: Identifying Time-Lagged Observation Causal Graph

1473 **Unified Modeling across Neighboring Time Points.** In the presence of time-lagged effects in the  
 1474 observed space, such as  $\mathbf{x}_{t-1} \rightarrow \mathbf{x}_t$ , alongside the causal DAG within  $\mathbf{x}_t$ , as depicted in Figure A9,  
 1475 we show that by introducing an expanded set of latent variables  $\mathbf{z}'_t = (\mathbf{z}_{t-1}, \mathbf{z}_t)$  and an expanded  
 1476 set of observed variables  $\mathbf{x}'_t = (\mathbf{x}_{t-1}, \mathbf{x}_t)$ , the property of functional equivalence is preserved.  
 1477 Moreover, identifiability continues to hold, and, broadly speaking, it becomes more accessible due to  
 1478 the incorporation of Granger causality principles in time-series data [15], if we assume that future  
 1479 events cannot influence or cause past events.

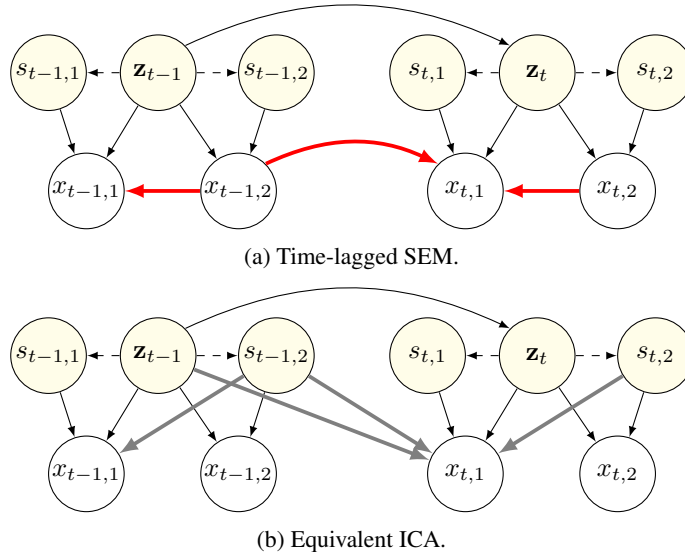

Figure A10: Equivalent time-lagged SEM and ICA in the case with time-lagged causal relationships in observed space. The red lines in Figure A10a indicate that information are transmitted by the instantaneous and the time-lagged observational causal graphs, while the gray lines in Figure A10b represent that the information transitions are equivalent to originating from contemporary  $\mathbf{s}_t$  and previous  $(\mathbf{z}_t, \mathbf{s}_{t-1,2})$  within the mixing structure.

1480 **Functional Equivalence in Presence of Time-Lagged Effects.** As shown in Figure A10, we show  
 1481 that, if we consider the time-lagged causal relationship in observed space, it still can be processed  
 1482 with the technique as in our paper proposed, through considering time-lagged causal relationships  
 1483 as a part of observational causal graph, by reformulating  $\mathbf{z}'_t = (\mathbf{z}_{t-1}, \mathbf{z}_t)$ ,  $\mathbf{x}'_t = (\mathbf{x}_{t-1}, \mathbf{x}_t)$  and  
 1484  $\mathbf{s}'_t = (\mathbf{s}_{t-1}, \mathbf{s}_t)$ , to apply the Corollary 2.2. Specifically, the time-lagged effects from  $\mathbf{x}_{t-2}$  can be  
 1485 considered as side information, which does not make difference to causal relationships from  $\mathbf{x}_{t-1}$  to  
 1486  $\mathbf{x}_t$  and its corresponding ICA form.

### 1487 D.2.3 Estimation Methodology

1488 **Slided Window.** Building on the analysis above, we aggregate two adjacent time-indexed observa-  
 1489 tions into a single new observation. By employing a sliding window with a step size of 1, we obtain  
 1490  $T - 1$  new observations along with their corresponding latent variables, thereby aligning with the  
 1491 estimation methodology described in Section 4.

1492 **Structure Prunning.** For structure learning, given the assumption that future climate cannot cause  
 1493 past climate, we can mask  $\frac{1}{4}$  of elements in the causal adjacency matrix during implementation, as  
 1494 depicted in Figure A11. Compared with the original implementation, the masking simplifies the  
 1495 difficulty of optimization by reducing the degrees of freedom in the graph.

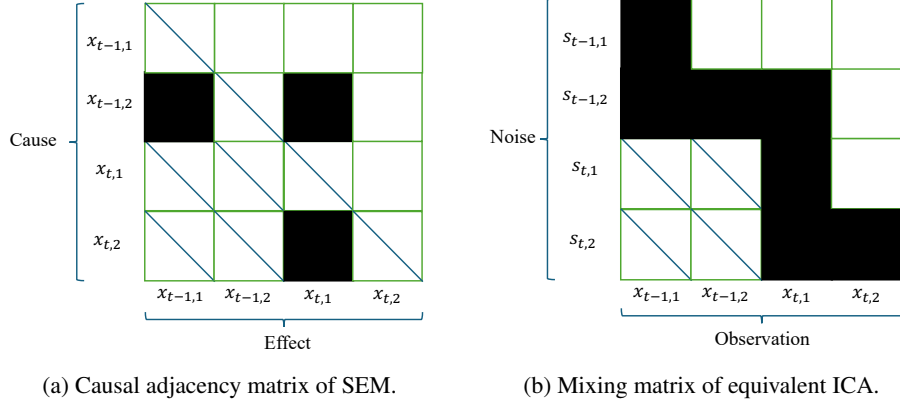

Figure A11: Interpreting Figure A10 with causal adjacency matrix of the SEM and the mixing matrix of the equivalent ICA. The diagonal lines indicate masked elements, as future events cannot cause past events, and self-loops are not permitted. Black blocks represent the presence of a causal relationship or functional dependency in the generating function  $g_m$ , while white blocks indicate the absence of such a relationship.

## 1496 E Broader Impacts

1497 The proposed CaDRe framework offers a substantial advancement in climate science by enabling  
 1498 the joint identification of latent dynamic processes and observational causal structures from purely  
 1499 observational data. Understanding these structures is critical for interpreting complex atmospheric  
 1500 phenomena, improving forecasting accuracy, and informing climate-related decision-making. By  
 1501 providing identifiability guarantees without relying on restrictive assumptions, CaDRe addresses  
 1502 fundamental limitations in existing climate modeling approaches, particularly in the presence of  
 1503 latent confounders and observational noise.

1504 The ability to recover interpretable latent drivers and causal graphs directly from climate data enhances  
 1505 scientific understanding and supports more transparent and robust climate models. This is especially  
 1506 valuable for anticipating and responding to climate variability and extreme events. Moreover, the  
 1507 theoretical framework underlying CaDRe extends to other scientific domains involving spatiotemporal  
 1508 processes, but its primary impact lies in improving the causal interpretability and empirical grounding  
 1509 of climate analyses. As such, CaDRe represents a step toward causally principled climate modeling,  
 1510 with the potential to inform both scientific inquiry and policy development.

## References

- [1] Kashif Abbass, Muhammad Zeeshan Qasim, Huaming Song, Muntasir Murshed, Haider Mahmood, and Ijaz Younis. A review of the global climate change impacts, adaptation, and sustainable mitigation measures. *Environmental Science and Pollution Research*, 29(28):42539–42559, 2022.
- [2] Lazar Atanackovic, Alexander Tong, Bo Wang, Leo J Lee, Yoshua Bengio, and Jason S Hartford. Dyngfn: Towards bayesian inference of gene regulatory networks with gflownets. *Advances in Neural Information Processing Systems*, 36, 2024.
- [3] Shaojie Bai, J Zico Kolter, and Vladlen Koltun. An empirical evaluation of generic convolutional and recurrent networks for sequence modeling. In *International Conference on Machine Learning*, pages 899–908. PMLR, 2018.
- [4] Tom Beucler and et al. Climatesnet: Bringing the power of deep learning to climate science at scale. *arXiv preprint arXiv:2101.07148*, 2021.
- [5] Julien Boé and Laurent Terray. Land–sea contrast, soil-atmosphere and cloud-temperature interactions: interplays and roles in future summer european climate change. *Climate dynamics*, 42(3):683–699, 2014.
- [6] Raymond J Carroll, Xiaohong Chen, and Yingyao Hu. Identification and estimation of nonlinear models using two samples with nonclassical measurement errors. *Journal of nonparametric statistics*, 22(4):379–399, 2010.
- [7] Guangyi Chen, Yifan Shen, Zhenhao Chen, Xiangchen Song, Yuewen Sun, Weiran Yao, Xiao Liu, and Kun Zhang. Caring: Learning temporal causal representation under non-invertible generation process. *arXiv preprint arXiv:2401.14535*, 2024.
- [8] Yi-Leng Chen and Jian-Jian Wang. The effects of precipitation on the surface temperature and airflow over the island of hawaii. *Monthly weather review*, 123(3):681–694, 1995.
- [9] Pierre Comon. Independent component analysis, a new concept? *Signal processing*, 36(3):287–314, 1994.
- [10] John B Conway. *A course in functional analysis*, volume 96. Springer Science & Business Media, 1994.
- [11] Xinshuai Dong, Biwei Huang, Ignavier Ng, Xiangchen Song, Yujia Zheng, Songyao Jin, Roberto Legaspi, Peter Spirtes, and Kun Zhang. A versatile causal discovery framework to allow causally-related hidden variables. *arXiv preprint arXiv:2312.11001*, 2023.
- [12] Nelson Dunford and Jacob T. Schwartz. *Linear Operators*. John Wiley & Sons, New York, 1971.
- [13] Imme Ebert-Uphoff and Yi Deng. Causal discovery for climate research using graphical models. *Journal of Climate*, 25(17):5648–5665, 2012.
- [14] Franklin M Fisher. A correspondence principle for simultaneous equation models. *Econometrica: Journal of the Econometric Society*, pages 73–92, 1970.
- [15] John R Freeman. Granger causality and the times series analysis of political relationships. *American Journal of Political Science*, pages 327–358, 1983.
- [16] Andreas Gerhardus and Jakob Runge. High-recall causal discovery for autocorrelated time series with latent confounders. *Advances in Neural Information Processing Systems*, 33:12615–12625, 2020.
- [17] Luigi Gresele, Julius Von Kügelgen, Vincent Stimper, Bernhard Schölkopf, and Michel Besserve. Independent mechanism analysis, a new concept? *Advances in neural information processing systems*, 34:28233–28248, 2021.
- [18] Shiyu Gu, Tim Januschowski, and Jan Gasthaus. Efficiently modeling time series with missing data using a state space approach. In *NeurIPS Time Series Workshop*, 2021.

- [19] Shiyu Gu, David Salinas, Valentin Flunkert, and Jan Gasthaus. Combining latent state-space models and structural time series models for probabilistic forecasting. *International Journal of Forecasting*, 37(3):1182–1199, 2021.
- [20] Shiyu Gu, David Salinas, Valentin Flunkert, Jan Gasthaus, and Tim Januschowski. Parameterization of state space models for forecasting with structured latent dynamics. *arXiv preprint arXiv:2202.09384*, 2022.
- [21] Sepp Hochreiter and Jürgen Schmidhuber. Long short-term memory. *Neural computation*, 9(8):1735–1780, 1997.
- [22] Patrik Hoyer, Dominik Janzing, Joris M Mooij, Jonas Peters, and Bernhard Schölkopf. Nonlinear causal discovery with additive noise models. *Advances in neural information processing systems*, 21, 2008.
- [23] Yingyao Hu and Susanne M Schennach. Instrumental variable treatment of nonclassical measurement error models. *Econometrica*, 76(1):195–216, 2008.
- [24] Yingyao Hu and Matthew Shum. Nonparametric identification of dynamic models with unobserved state variables. *Journal of Econometrics*, 171(1):32–44, 2012.
- [25] Biwei Huang, Kun Zhang, Mingming Gong, and Clark Glymour. Causal discovery and forecasting in nonstationary environments with state-space models. In *International conference on machine learning*, pages 2901–2910. Pmlr, 2019.
- [26] Biwei Huang, Kun Zhang, Jiji Zhang, Joseph Ramsey, Ruben Sanchez-Romero, Clark Glymour, and Bernhard Schölkopf. Causal discovery from heterogeneous/nonstationary data. *Journal of Machine Learning Research*, 21(89):1–53, 2020.
- [27] Aapo Hyvärinen, Ilyes Khemakhem, and Hiroshi Morioka. Nonlinear independent component analysis for principled disentanglement in unsupervised deep learning. *Patterns*, 4(10), 2023.
- [28] Aapo Hyvarinen and Hiroshi Morioka. Unsupervised feature extraction by time-contrastive learning and nonlinear ica. *Advances in neural information processing systems*, 29, 2016.
- [29] Aapo Hyvarinen and Hiroshi Morioka. Nonlinear ica of temporally dependent stationary sources. In *Artificial Intelligence and Statistics*, pages 460–469. PMLR, 2017.
- [30] Aapo Hyvärinen and Petteri Pajunen. Nonlinear independent component analysis: Existence and uniqueness results. *Neural networks*, 12(3):429–439, 1999.
- [31] Aapo Hyvarinen, Hiroaki Sasaki, and Richard Turner. Nonlinear ica using auxiliary variables and generalized contrastive learning. In *The 22nd International Conference on Artificial Intelligence and Statistics*, pages 859–868. PMLR, 2019.
- [32] Ilyes Khemakhem, Diederik Kingma, Ricardo Monti, and Aapo Hyvarinen. Variational autoencoders and nonlinear ica: A unifying framework. In *International Conference on Artificial Intelligence and Statistics*, pages 2207–2217. PMLR, 2020.
- [33] Diederik P Kingma. Auto-encoding variational bayes. *arXiv preprint arXiv:1312.6114*, 2013.
- [34] David Klindt, Lukas Schott, Yash Sharma, Ivan Ustyuzhaninov, Wieland Brendel, Matthias Bethge, and Dylan Paiton. Towards nonlinear disentanglement in natural data with temporal sparse coding. *arXiv preprint arXiv:2007.10930*, 2020.
- [35] Oleksandr Klushyn and et al. Latent-space forecasting of climate variables using variational autoencoders. *arXiv preprint arXiv:2107.01227*, 2021.
- [36] Lingjing Kong, Biwei Huang, Feng Xie, Eric Xing, Yuejie Chi, and Kun Zhang. Identification of nonlinear latent hierarchical models. *Advances in Neural Information Processing Systems*, 36:2010–2032, 2023.
- [37] Sébastien Lachapelle, Philippe Brouillard, Tristan Deleu, and Simon Lacoste-Julien. Gradient-based neural dag learning. *arXiv preprint arXiv:1906.02226*, 2019.

- [38] Sébastien Lachapelle, Pau Rodríguez López, Yash Sharma, Katie Everett, Rémi Le Priol, Alexandre Lacoste, and Simon Lacoste-Julien. Nonparametric partial disentanglement via mechanism sparsity: Sparse actions, interventions and sparse temporal dependencies. *arXiv preprint arXiv:2401.04890*, 2024.
- [39] Sébastien Lachapelle, Pau Rodriguez, Yash Sharma, Katie E Everett, Rémi Le Priol, Alexandre Lacoste, and Simon Lacoste-Julien. Disentanglement via mechanism sparsity regularization: A new principle for nonlinear ica. In *Conference on Causal Learning and Reasoning*, pages 428–484. PMLR, 2022.
- [40] Guokun Lai, Wei-Cheng Chang, Yiming Yang, and Hanxiao Liu. Modeling long- and short-term temporal patterns with deep neural networks. In *The 41st International ACM SIGIR Conference on Research & Development in Information Retrieval*, pages 95–104, 2018.
- [41] Remi Lam and et al. Graphcast: Learning skillful medium-range global weather forecasting. *arXiv preprint arXiv:2212.12794*, 2022.
- [42] Jan Lemeire and Dominik Janzing. Replacing causal faithfulness with algorithmic independence of conditionals. *Minds and Machines*, 23:227–249, 2013.
- [43] Zijian Li, Yifan Shen, Kaitao Zheng, Ruichu Cai, Xiangchen Song, Mingming Gong, Guangyi Chen, and Kun Zhang. On the identification of temporal causal representation with instantaneous dependence. In *The Thirteenth International Conference on Learning Representations*, 2025.
- [44] Juan Lin. Factorizing multivariate function classes. *Advances in neural information processing systems*, 10, 1997.
- [45] Phillip Lippe, Sara Magliacane, Sindy Löwe, Yuki M Asano, Taco Cohen, and Efstratios Gavves. Causal representation learning for instantaneous and temporal effects in interactive systems. *arXiv preprint arXiv:2206.06169*, 2022.
- [46] Peiyuan Liu, Beiliang Wu, Yifan Hu, Naiqi Li, Tao Dai, Jigang Bao, and Shu-tao Xia. Timebridge: Non-stationarity matters for long-term time series forecasting. *arXiv preprint arXiv:2410.04442*, 2024.
- [47] Wenqin Liu, Biwei Huang, Erdun Gao, Qihong Ke, Howard Bondell, and Mingming Gong. Causal discovery with mixed linear and nonlinear additive noise models: A scalable approach. In *Causal Learning and Reasoning*, pages 1237–1263. PMLR, 2024.
- [48] Yong Liu, Tengge Hu, Haoran Zhang, Haixu Wu, Shiyu Wang, Lintao Ma, and Mingsheng Long. itransformer: Inverted transformers are effective for time series forecasting. *arXiv preprint arXiv:2310.06625*, 2023.
- [49] Yong Liu, Haixu Wu, Jianmin Wang, and Mingsheng Long. Non-stationary transformers: Exploring the stationarity in time series forecasting. *Advances in neural information processing systems*, 35:9881–9893, 2022.
- [50] Stephanie Long, Alexandre Piché, Valentina Zantedeschi, Tibor Schuster, and Alexandre Drouin. Causal discovery with language models as imperfect experts. *arXiv preprint arXiv:2307.02390*, 2023.
- [51] Valerio Lucarini, Richard Blender, Corentin Herbert, Francesco Ragone, Salvatore Pascale, and Jeroen Wouters. Mathematical and physical ideas for climate science. *Reviews of Geophysics*, 52(4):809–859, 2014.
- [52] Chris J. Maddison, Andriy Mnih, and Yee Whye Teh. The concrete distribution: A continuous relaxation of discrete random variables. In *International Conference on Learning Representations*, 2017.
- [53] Lutz Mattner. Some incomplete but boundedly complete location families. *The Annals of Statistics*, pages 2158–2162, 1993.
- [54] Ricardo Pio Monti, Kun Zhang, and Aapo Hyvärinen. Causal discovery with general non-linear relationships using non-linear ica. In *Uncertainty in artificial intelligence*, pages 186–195. PMLR, 2020.

- [55] Hiroshi Morioka and Aapo Hyvärinen. Causal representation learning made identifiable by grouping of observational variables. *arXiv preprint arXiv:2310.15709*, 2023.
- [56] Ignavier Ng, Shengyu Zhu, Zhuangyan Fang, Haoyang Li, Zhitang Chen, and Jun Wang. Masked gradient-based causal structure learning. In *Proceedings of the 2022 SIAM International Conference on Data Mining (SDM)*, pages 424–432. SIAM, 2022.
- [57] Yuqi Nie, Nam H Nguyen, Phanwadee Sinthong, and Jayant Kalagnanam. A time series is worth 64 words: Long-term forecasting with transformers. *arXiv preprint arXiv:2211.14730*, 2022.
- [58] Jaideep Pathak and et al. Fourcastnet: Global medium-range weather forecasting with graph neural networks. *arXiv preprint arXiv:2202.11214*, 2022.
- [59] Judea Pearl. *Causality*. Cambridge university press, 2009.
- [60] Jonas Peters, Dominik Janzing, and Bernhard Schölkopf. *Elements of causal inference: foundations and learning algorithms*. The MIT Press, 2017.
- [61] Goutham Rajendran, Simon Buchholz, Bryon Aragam, Bernhard Schölkopf, and Pradeep Ravikumar. Learning interpretable concepts: Unifying causal representation learning and foundation models. *arXiv preprint arXiv:2402.09236*, 2024.
- [62] Stephan Rasp, Peter D Dueben, Sebastian Scher, Jonathan A Weyn, Soukayna Mouatadid, and Nils Thuerey. Weatherbench: a benchmark data set for data-driven weather forecasting. *Journal of Advances in Modeling Earth Systems*, 12(11):e2020MS002203, 2020.
- [63] Markus Reichstein and et al. Deep learning and process understanding for data-driven earth system science. *Nature*, 566(7743):195–204, 2019.
- [64] Patrik Reizinger, Yash Sharma, Matthias Bethge, Bernhard Schölkopf, Ferenc Huszár, and Wieland Brendel. Jacobian-based causal discovery with nonlinear ica. *Transactions on Machine Learning Research*, 2023.
- [65] Paul Rolland, Volkan Cevher, Matthäus Kleindessner, Chris Russell, Dominik Janzing, Bernhard Schölkopf, and Francesco Locatello. Score matching enables causal discovery of nonlinear additive noise models. In *International Conference on Machine Learning*, pages 18741–18753. PMLR, 2022.
- [66] David Rolnick, Priya L Donti, Lynn H Kaack, Kelly Kochanski, Alexandre Lacoste, Kris Sankaran, Andrew Slavin Ross, Nikola Milojevic-Dupont, Natasha Jaques, Anna Waldman-Brown, et al. Tackling climate change with machine learning. *ACM Computing Surveys (CSUR)*, 55(2):1–96, 2022.
- [67] Jakob Runge. Discovering contemporaneous and lagged causal relations in autocorrelated nonlinear time series datasets. In *Conference on Uncertainty in Artificial Intelligence*, pages 1388–1397. Pmlr, 2020.
- [68] Jakob Runge, Sebastian Bathiany, Erik Bollt, Gustau Camps-Valls, Dim Coumou, Ethan Deyle, Clark Glymour, Marlene Kretschmer, Miguel D Mahecha, Jordi Muñoz-Marí, et al. Inferring causation from time series in earth system sciences. *Nature communications*, 10(1):2553, 2019.
- [69] Jakob Runge, Peer Nowack, Marlene Kretschmer, Seth Flaxman, and Dino Sejdinovic. Detecting and quantifying causal associations in large nonlinear time series datasets. *Science advances*, 5(11):eaau4996, 2019.
- [70] David Salinas, Valentin Flunkert, Jan Gasthaus, and Tim Januschowski. Deepar: Probabilistic forecasting with autoregressive recurrent networks. In *International Journal of Forecasting*, volume 36, pages 1181–1191. Elsevier, 2020.
- [71] Bernhard Schölkopf, Francesco Locatello, Stefan Bauer, Nan Rosemary Ke, Nal Kalchbrenner, Anirudh Goyal, and Yoshua Bengio. Toward causal representation learning. *Proceedings of the IEEE*, 109(5):612–634, 2021.

- [72] Shohei Shimizu, Patrik O Hoyer, Aapo Hyvärinen, Antti Kerminen, and Michael Jordan. A linear non-gaussian acyclic model for causal discovery. *Journal of Machine Learning Research*, 7(10), 2006.
- [73] Alessio Spantini, Daniele Bigoni, and Youssef Marzouk. Inference via low-dimensional couplings. *The Journal of Machine Learning Research*, 19(1):2639–2709, 2018.
- [74] Peter Spirtes and Clark Glymour. An algorithm for fast recovery of sparse causal graphs. *Social science computer review*, 9(1):62–72, 1991.
- [75] Peter Spirtes, Clark Glymour, and Richard Scheines. *Causation, prediction, and search*. MIT press, 2001.
- [76] Adolf Stips, Diego Macias, Clare Coughlan, Elisa Garcia-Gorriz, and X San Liang. On the causal structure between co2 and global temperature. *Scientific reports*, 6(1):21691, 2016.
- [77] Benjamin A. Toms and Elizabeth A. Barnes. Physically interpretable neural networks for the geosciences: Applications to earth system variability. *Journal of Advances in Modeling Earth Systems*, 12(12), 2020.
- [78] Robert Vautard, Geert Jan Van Oldenborgh, Friederike EL Otto, Pascal Yiou, Hylke De Vries, Erik Van Meijgaard, Andrew Stepek, Jean-Michel Soubeyroux, Sjoukje Philip, Sarah F Kew, et al. Human influence on european winter wind storms such as those of january 2018. *Earth System Dynamics*, 10(2):271–286, 2019.
- [79] Huiqiang Wang, Jian Peng, Feihu Huang, Jince Wang, Junhui Chen, and Yifei Xiao. Micn: Multi-scale local and global context modeling for long-term series forecasting. In *The Eleventh International Conference on Learning Representations*, 2022.
- [80] Xue Wang, Tian Zhou, Qingsong Wen, Jinyang Gao, Bolin Ding, and Rong Jin. Card: Channel aligned robust blend transformer for time series forecasting. In *The Twelfth International Conference on Learning Representations*, 2023.
- [81] Haixu Wu, Tengge Hu, Yong Liu, Hang Zhou, Jianmin Wang, and Mingsheng Long. Timesnet: Temporal 2d-variation modeling for general time series analysis. *arXiv preprint arXiv:2210.02186*, 2022.
- [82] Haixu Wu, Jiehui Xu, Jianmin Wang, and Mingsheng Long. Autoformer: Decomposition transformers with auto-correlation for long-term series forecasting. *Advances in Neural Information Processing Systems*, 34:22419–22430, 2021.
- [83] Zhijian Xu, Ailing Zeng, and Qiang Xu. FITS: Modeling time series with \$10k\$ parameters. In *The Twelfth International Conference on Learning Representations*, 2024.
- [84] Dingling Yao, Caroline Muller, and Francesco Locatello. Marrying causal representation learning with dynamical systems for science. *arXiv preprint arXiv:2405.13888*, 2024.
- [85] Dingling Yao, Danru Xu, Sébastien Lachapelle, Sara Magliacane, Perouz Taslakian, Georg Martius, Julius von Kügelgen, and Francesco Locatello. Multi-view causal representation learning with partial observability. *arXiv preprint arXiv:2311.04056*, 2023.
- [86] Weiran Yao, Guangyi Chen, and Kun Zhang. Temporally disentangled representation learning. *Advances in Neural Information Processing Systems*, 35:26492–26503, 2022.
- [87] Weiran Yao, Yuewen Sun, Alex Ho, Changyin Sun, and Kun Zhang. Learning temporally causal latent processes from general temporal data. *arXiv preprint arXiv:2110.05428*, 2021.
- [88] Weiwei Ye, Songgaojun Deng, Qiaosha Zou, and Ning Gui. Frequency adaptive normalization for non-stationary time series forecasting. *arXiv preprint arXiv:2409.20371*, 2024.
- [89] Yue Yu, Jie Chen, Tian Gao, and Mo Yu. Dag-gnn: Dag structure learning with graph neural networks. In *International Conference on Machine Learning*, pages 7154–7163. PMLR, 2019.



- 1745 [90] Ailing Zeng, Muxi Chen, Lei Zhang, and Qiang Xu. Are transformers effective for time series  
1746 forecasting? In *Proceedings of the AAAI conference on artificial intelligence*, volume 37, pages  
1747 11121–11128, 2023.
- 1748 [91] Jiji Zhang. A comparison of three occam’s razors for markovian causal models. *The British*  
1749 *journal for the philosophy of science*, 2013.
- 1750 [92] Kun Zhang and Aapo Hyvarinen. On the identifiability of the post-nonlinear causal model.  
1751 *arXiv preprint arXiv:1205.2599*, 2012.
- 1752 [93] Kun Zhang, Jonas Peters, Dominik Janzing, and Bernhard Schölkopf. Kernel-based conditional  
1753 independence test and application in causal discovery. *arXiv preprint arXiv:1202.3775*, 2012.
- 1754 [94] Kun Zhang, Shaoan Xie, Ignavier Ng, and Yujia Zheng. Causal representation learning from  
1755 multiple distributions: A general setting. *arXiv preprint arXiv:2402.05052*, 2024.
- 1756 [95] Yujia Zheng, Biwei Huang, Wei Chen, Joseph Ramsey, Mingming Gong, Ruichu Cai, Shohei  
1757 Shimizu, Peter Spirtes, and Kun Zhang. Causal-learn: Causal discovery in python. *Journal of*  
1758 *Machine Learning Research*, 25(60):1–8, 2024.
- 1759 [96] Yujia Zheng, Ignavier Ng, Yewen Fan, and Kun Zhang. Generalized precision matrix for  
1760 scalable estimation of nonparametric markov networks. *arXiv preprint arXiv:2305.11379*, 2023.
- 1761 [97] Yujia Zheng, Ignavier Ng, and Kun Zhang. On the identifiability of nonlinear ica: Sparsity and  
1762 beyond. *Advances in neural information processing systems*, 35:16411–16422, 2022.
- 1763 [98] Yujia Zheng and Kun Zhang. Generalizing nonlinear ica beyond structural sparsity. *Advances*  
1764 *in Neural Information Processing Systems*, 36:13326–13355, 2023.
- 1765 [99] Haoyi Zhou, Shanghang Zhang, Jieqi Peng, Shuai Zhang, Jianxin Li, Hui Xiong, and Wancai  
1766 Zhang. Informer: Beyond efficient transformer for long sequence time-series forecasting. In  
1767 *Proceedings of the AAAI conference on artificial intelligence*, volume 35, pages 11106–11115,  
1768 2021.  
1769
